# Supplementary material
Source: PubMed Central journal article supplement (PMC4878653)

## Supplementary Appendix

This appendix has been provided by the authors to give readers additional information about their work.

Supplement to: Gerlinger M, Rowan AJ, Horswell S, et al. Intratumor heterogeneity and branched evolution revealed by multiregion sequencing. *N Engl J Med* 2012;366:883-92.

# **Intratumor Heterogeneity and Darwinian Selection Revealed by Renal Cancer Sequencing**

## **Supplementary Material Table of Contents**

### **Contents**

|                                                                                                                                                         |           |
|---------------------------------------------------------------------------------------------------------------------------------------------------------|-----------|
| <b>Author Contributions.....</b>                                                                                                                        | <b>1</b>  |
| <b>Materials and Methods.....</b>                                                                                                                       | <b>2</b>  |
| E-PREDICT Trial and Patient Consent.....                                                                                                                | 2         |
| Tumor and Normal Tissue Processing.....                                                                                                                 | 2         |
| Multi region exome sequencing .....                                                                                                                     | 2         |
| Bioinformatics analyses.....                                                                                                                            | 2         |
| Mutation frequencies in region R4.....                                                                                                                  | 2         |
| SNP-array analysis and DNA segmentation.....                                                                                                            | 2         |
| Detection of allelic imbalance.....                                                                                                                     | 2         |
| Analysis of chromosome 3p signal intensities in patient 001.....                                                                                        | 2         |
| mRNA Expression Analysis.....                                                                                                                           | 2         |
| mTOR Functional Analysis.....                                                                                                                           | 2         |
| Regional Ploidy Profiling Analysis.....                                                                                                                 | 2         |
| Immunohistochemistry and Functional Analyses.....                                                                                                       | 2         |
| Validation of candidate somatic mutations.....                                                                                                          | 3         |
| <b>Supplementary Table 1: Sequencing coverage in patients 001 and 002.....</b>                                                                          | <b>4</b>  |
| <b>Supplementary Table 2: Details of 133 somatic mutations identified in patient 001.....</b>                                                           | <b>5</b>  |
| <b>Supplementary Table 3: Frequencies of 127 somatic mutations characterized by the ultra-deep sequencing of regions R4 and R9 in patient 001. ....</b> | <b>10</b> |
| <b>Supplementary Table 4: Details of 119 somatic mutations identified in patient 002.....</b>                                                           | <b>42</b> |
| <b>Supplementary Figure Legends.....</b>                                                                                                                | <b>58</b> |
| Supplementary Figure 1: Regional validation of mutations identified by multi-region exome sequencing in patient 001.....                                | 58        |



|                                                                                                                                                               |    |
|---------------------------------------------------------------------------------------------------------------------------------------------------------------|----|
| Supplementary Figure 2: Variant frequencies for R4 in ultra-deep sequencing data.....                                                                         | 58 |
| Supplementary Figure 3: Patient 001 phylogenetic tree based on synonymous and non-coding mutations.....                                                       | 58 |
| Supplementary Figure 4: Somatic mutations by regions.....                                                                                                     | 58 |
| Supplementary Figure 5: Patient 001 SNP array data analysis.....                                                                                              | 58 |
| Supplementary Figure 6: Immunohistochemical staining for H3K36me3 in patient 001.....                                                                         | 58 |
| Supplementary Figure 7: Alignment of mTOR to PI3K-beta and the secondary structure for PI3K-beta (PDB code 2Y3A).....                                         | 58 |
| Supplementary Figure 8: Regional validation of mutations identified by multi-region exome sequencing in patient 002.....                                      | 58 |
| Supplementary Figure 9: Somatic mutations in patient 002.....                                                                                                 | 58 |
| Supplementary Figure 10: Ploidy profiles of patients 002-004.....                                                                                             | 58 |
| Supplementary Figure 11: Allelic imbalance (AI) in patients 002, 003 and 004. ....                                                                            | 58 |
| Supplementary Figure 12: Immunohistochemical detection of Histone H3K36 methylation status in patient 001 .....                                               | 58 |
| Supplementary Figure 13: Phospho-Akt staining for PTEN activity in patient 002.....                                                                           | 58 |
| Representative phospho-Akt (Ser473) staining of tumor regions with wild type (WT) PTEN (R4), PTEN carrying a missense (R7) or splice-site mutation (R10)..... | 58 |
| Supplementary Figure 14: Immunohistochemical detection of Histone H3K36 methylation status in patient 004.....                                                | 58 |

**References..... 59**

**Materials and Methods..... 1**

|                                                                         |          |
|-------------------------------------------------------------------------|----------|
| <u>E-PREDICT Trial and Patient Consent.....</u>                         | <u>1</u> |
| <u>Tumor and Normal Tissue Processing.....</u>                          | <u>1</u> |
| <u>Multi region exome sequencing .....</u>                              | <u>1</u> |
| <u>Bioinformatics analyses.....</u>                                     | <u>1</u> |
| <u>Mutation frequencies in region R4.....</u>                           | <u>1</u> |
| <u>SNP-array analysis and DNA segmentation.....</u>                     | <u>1</u> |
| <u>Detection of allelic imbalance.....</u>                              | <u>1</u> |
| <u>Analysis of chromosome 3p signal intensities in patient 001.....</u> | <u>1</u> |
| <u>mRNA Expression Analysis.....</u>                                    | <u>1</u> |
| <u>mTOR Functional Analysis.....</u>                                    | <u>1</u> |
| <u>Regional Ploidy Profiling Analysis.....</u>                          | <u>2</u> |
| <u>Immunohistochemistry and Functional Analyses.....</u>                | <u>2</u> |
| <u>Validation of candidate somatic mutations.....</u>                   | <u>2</u> |

**Supplementary Table 1: Sequencing coverage in patients 001 and 002..... 3**

**Supplementary Table 2: Details of 133 somatic mutations identified in patient 001..... 4**

|                                                                                                                                                                      |                  |
|----------------------------------------------------------------------------------------------------------------------------------------------------------------------|------------------|
| <b><u>Supplementary Table 3: Frequencies of 127 somatic mutations characterized by the ultra-deep sequencing of regions R4 and R9 in patient 001. ....</u></b>       | <b><u>9</u></b>  |
| <b><u>Supplementary Table 4: Details of 119 somatic mutations identified in patient 002.....</u></b>                                                                 | <b><u>41</u></b> |
| <b><u>Supplementary Figure Legends.....</u></b>                                                                                                                      | <b><u>57</u></b> |
| <u>Supplementary Figure 1: Regional validation of mutations identified by multi-region exome sequencing in patient 001.....</u>                                      | <u>57</u>        |
| <u>Supplementary Figure 2: Variant frequencies for R4 in ultra-deep sequencing data.....</u>                                                                         | <u>57</u>        |
| <u>Supplementary Figure 3: Patient 001 phylogenetic tree based on synonymous and non-coding mutations.....</u>                                                       | <u>57</u>        |
| <u>Supplementary Figure 4: Somatic mutations by regions.....</u>                                                                                                     | <u>57</u>        |
| <u>Supplementary Figure 5: Patient 001 SNP array data analysis.....</u>                                                                                              | <u>57</u>        |
| <u>Supplementary Figure 6: Immunohistochemical staining for H3K36me3 in patient 001.....</u>                                                                         | <u>57</u>        |
| <u>Supplementary Figure 7: Alignment of mTOR to PI3K-beta and the secondary structure for PI3K-beta (PDB code 2Y3A).....</u>                                         | <u>57</u>        |
| <u>Supplementary Figure 8: Regional validation of mutations identified by multi-region exome sequencing in patient 002.....</u>                                      | <u>57</u>        |
| <u>Supplementary Figure 9: Somatic mutations in patient 002.....</u>                                                                                                 | <u>57</u>        |
| <u>Supplementary Figure 10: Ploidy profiles of patients 002-004.....</u>                                                                                             | <u>57</u>        |
| <u>Supplementary Figure 11: Allelic imbalance (AI) in patients 002, 003 and 004. ....</u>                                                                            | <u>57</u>        |
| <u>Supplementary Figure 12: Immunohistochemical detection of Histone H3K36 methylation status in patient 001 .....</u>                                               | <u>57</u>        |
| <u>Supplementary Figure 13: Phospho-Akt staining for PTEN activity in patient 002.....</u>                                                                           | <u>57</u>        |
| <u>Representative phospho-Akt (Ser473) staining of tumor regions with wild type (WT) PTEN (R4), PTEN carrying a missense (R7) or splice-site mutation (R10).....</u> | <u>57</u>        |
| <u>Supplementary Figure 14: Immunohistochemical detection of Histone H3K36 methylation status in patient 004.....</u>                                                | <u>57</u>        |
| <b><u>References.....</u></b>                                                                                                                                        | <b><u>58</u></b> |

## Author Contributions

MGe and CSw designed the study, MGe, AR, NM, BS-D, EG, GC, CSa, BP, SB, DJ, KR, CL, JL, LP, MN and MG gathered the data, MGe, SH, DE, PM, EG, AS, PT, IV, NMc, JD, GS, AR, AE, ZS, AF and CSw analyzed the data, CSw, MGe, PAF and SH

vouch for the data and the analysis, MGe and CSw wrote the paper, all authors approved and decided to publish the paper.

## Materials and Methods

### E-PREDICT Trial and Patient Consent

The E-PREDICT translational clinical trial (EUDRACT number: 2009-013381-54, <http://public.ukcrn.org.uk/Search/StudyDetail.aspx?StudyID=10710>, open to recruitment since January 2010, Principle Investigator: JL) of pre- and post-nephrectomy Everolimus treatment in patients presenting with metastatic renal cell carcinoma was approved by the Royal Marsden Hospital Research Ethics Committee. The first 4 patients (001-004) enrolled in this trial gave written informed consent for study participation and for the translational analyses presented here.

#### Patient characteristics:

| Patient | Age | Sex | Histological Diagnosis          | Fuhrman Grade | Stage  |
|---------|-----|-----|---------------------------------|---------------|--------|
| 001     | 75  | M   | Clear cell renal cell carcinoma | 1-4           | T3N2M1 |
| 002     | 59  | M   | Clear cell renal cell carcinoma | 1             | T3N0M1 |
| 003     | 64  | F   | Clear cell renal cell carcinoma | 1-4           | T3N0M1 |
| 004     | 57  | F   | Clear cell renal cell carcinoma | 1-2           | T2N0M1 |

Patients underwent a pre-treatment core biopsy of the primary tumor for pathological confirmation of a renal cell carcinoma and molecular analyses. Patients were treated with Everolimus 10 mg once daily for 6 weeks and underwent a cytoreductive nephrectomy after a 1 week washout period. Everolimus treatment was resumed after wound healing was complete and continued until disease progression. Computed tomographic staging of thorax, abdomen and pelvis was performed before Everolimus treatment started, before nephrectomy and in 8 weekly intervals from the time patients re-started Everolimus after nephrectomy.

### **Tumor and Normal Tissue Processing**

Eight to ten 10x5x5 mm samples, representing the spatial extent and macroscopic heterogeneity of the nephrectomy specimen, were harvested from each nephrectomy specimen and two samples from the metastectomy specimens from patient 001. Samples were macrodissected to minimize stromal contamination and half of each sample was snap frozen in liquid nitrogen within 45 minutes after clamping of the renal artery. The other half was formalin fixed and embedded in paraffin in order to confirm the pathological diagnosis and to assess tumor and stromal cell content. Sample harvesting was performed according to strict SOPs in all cases and documented by photography. In patient 001, 60% of cells in R5 were estimated to be tumor cells whereas all other sections contained more than 75% tumor cells. Specimens from patient 002 had lower relative tumor cell contents (median 52% on histopathological review) because very large grade 1 tumour cells were surrounded by a high proportion of small stromal cells. Microdissection was not undertaken in

5

order to avoid random selection of intra-regional subclones and whole genome amplification which could have caused an increased error rate. From patient 002, core biopsies were obtained from a liver metastasis which remained stable on treatment for 5 months until progression was detected on a routine re-staging CT scan. One core biopsy was snap frozen in liquid nitrogen and a second biopsy was paraffin embedded and confirmed viable clear cell renal cell carcinoma. DNA and RNA were purified using the Qiagen (Crawley, UK) DNeasy and the RNeasy extraction kits following the manufacturer's instructions. Germ line DNA was extracted from peripheral blood mononuclear cells from whole blood (patients 001-004) and also from normal kidney tissue (patient 002) by the Qiagen DNeasy kit. Nucleic acid yield and quality was determined spectrophotometrically using a NanoDrop (Thermo Scientific) analyzer. The quality and integrity of the RNA and DNA was examined after agarose gel electrophoresis. Macrodissection and sampling was performed by GS, MGe, MN and AR, histopathological review by GS and DNA and RNA extraction by MN and AR.

### **Multi region exome sequencing**

All samples from patient 001 were normalized to 3µg of DNA and sheared to 150–200bp using a Covaris S2 (Covaris, Woburn, MA, USA), following the SureSelect Human All Exon 50Mb kit protocol run parameters<sup>1</sup>. In four samples (R1, R8, M1 and germ line DNA), both the SureSelect Human All Exon 50Mb and NimbleGen SeqCap EZ Whole Exome v2.0 <sup>1</sup>(Roche NimbleGen, Inc.) kits were used in parallel for exon capture. Using the BioAnalyser 2100 (Agilent, Santa Clara, CA, USA), the sheared samples

were validated before library preparation was continued. The SureSelect Human All Exon 50Mb protocol was followed for library preparation <sup>1</sup>. The sheared DNA samples were end repaired, poly A tailed and Illumina Paired End Adapters were ligated. Library PCR of 4 cycles was performed using the Herculase II Fusion DNA Polymerase<sup>1</sup>. The SureSelect protocol was followed for the in-solution hybridisation of the libraries<sup>1-3</sup>. Excessive evaporation could cause bias in late hybridisation and any capture library post incubation resulting in under 20ul total volume was remade. After a final quality control using the BioAnalyser 2100 (Agilent), the capture libraries were ready for Flowcell cluster formation on a cluster station<sup>4,5</sup> and then 72bp Paired End Sequenced by synthesis on the Genetic Analyser Iix (Illumina)<sup>4-7</sup>. Two lanes were required per region to provide an average read depth in excess of 30-fold. Generation of the ultra deep sequencing datasets of R4 and R9 required an entire 8 lane flow cell, each. Patient 001 sequencing experiments were performed by NM. Patient 002 samples were captured by the SureSelect Human All Exon 50Mb kit and 75bp Paired End Sequenced as described <sup>8</sup> on an Illumina HiSeq analyzer by PAF. Two samples were multiplexed per lane to achieve coverage in excess of 30-fold.

### **Bioinformatics analyses**

Patient 001 data: 72bp paired raw reads were extracted from Eland export files (including reads which did not pass the Eland "chastity" filter) to fastq format and subsequently aligned to hg19 using bwa 0-5.9 <sup>9</sup> with a seed

length of 72 bases. All other settings were left as default (in particular, up to 3 mismatches were allowed per read). Aligned sam files were converted to bam format, sorted, indexed, replicates merged and reconverted to pileup format using samtools 0.1.16<sup>10</sup>, with variant calling performed by SNVMix2 0.11.8<sup>11</sup>.

Calls were then filtered using the following criteria for each variant position: Minimum of 10x coverage in the germline sample with zero non-reference reads; Minimum of 10x coverage in the tumor sample in which the variant is detected; Minimum of 95% confidence of a non-reference call given by SNVMix2; Variant position must not be listed in dbSNP (v132)<sup>12</sup>; Variant position must be annotated as exonic by RefSeq (Release 45) or, in the case of a splice-site variant, lie within the two flanking base-pairs of an exonic region; Synonymous/non-synonymous calls were made using dbSNP<sup>12</sup>; Filtering was performed with R 2.13.0<sup>13</sup>, using the Bioconductor package ShortRead<sup>14</sup> to determine coverage levels from sorted bam files and various in-house parsers written in C. We saw no evidence of a systematic bias towards an increased proportion of alternate reads in the Nimblegen captured samples vs. the Agilent captured samples (paired, one sided Wilcoxon test,  $p = 0.9951$ )

Non-synonymous mutations, called in at least one region and for which wild type or mutant calls had been made by SNVMix2 for at least 50% of the sequenced tumor regions, were selected for manual review. Mutations which were called in poorly aligned reads or which showed a characteristic profile suggestive of a sequencing error<sup>15</sup> were excluded from further

analysis. Small insertions and deletions (INDELs) were called with a modified version of Pindel as described previously<sup>8</sup>. INDELs present in the blood were excluded from further analysis. A region was called positive for a point mutation or INDEL if more than 1 read within the region contained the variant. Clonal ordering analysis was performed as described <sup>16</sup>.

All genomic positions carrying a somatic mutation detected in the multi-region sequencing analysis of patient 001 (Supplementary Table 1) were reviewed in the ultra-deep exome sequencing data for R4 and R9. A mutation was called if more than 1% of the reads contained the variant.

Patient 002 multi-region sequencing data was processed and variants were called on the CAVEMAN and PINDEL pipeline as described<sup>8</sup>. INDELS or nucleotide variants which could be detected in the germline samples were excluded from the analysis. Non-synonymous mutations were identified and filtered as described <sup>8</sup> and mutations in poorly aligned regions or those showing an Illumina sequencer specific error profile <sup>15</sup> were removed manually. A region was called positive for a point mutation or INDEL if more than 1 read within the region contained the variant.

Patient 001 data were collated, processed and analysed by SH, AS, PM, MGe and patient 002 data by PAF, DJ, IV, AB, KR, PT and MGe.

### **Mutation frequencies in region R4**

Somatic mutations identified with the standard sequencing depth in regions R4 and R9 were further investigated with ultra-deep sequencing. Mutation frequencies were defined as the ratio of mutant reads against



the total number of reads spanning the variant position (supplementary table 3). Greater than 40-fold coverage was achieved in the ultra-deep sequencing dataset for all mutations previously reported to be present in R4/R9. Data analysis was performed by SH, PM and MGe.

### **SNP-array analysis and DNA segmentation**

DNA was processed and hybridized to Illumina Human Omni 2.5 SNP arrays according to the manufacturer's protocol. Not enough DNA was available to perform SNP array analysis for regions R8 and M from patient 002 and region R7 from patient 004. Illumina's GenomeStudio software was used to obtain B allele frequencies (BAF) and normalized logarithmic probe intensities (log R ratios) from the raw output data. Because of weak call rates ( $<0.94$ ), SNP data for tumor regions R1, R3 and R5 from patient 001 were excluded from the analysis and region R5 from patient 004 was removed based on high noise to signal ratios in the BAF. Mirrored BAF (mBAF) were generated by reflecting the BAF values along the 0.5 axis. Non-informative homozygous calls were removed from each sample by filtering out SNP with mBAF values  $\geq 0.9$  in the blood or  $\geq 0.95$  in the tumor sample. In addition, outliers were removed by triplet filtering as described [17](#) with a 0.8 threshold for outlier detection. SNPs on chromosomes X and Y were excluded from the analysis. Segmentation of the smoothed filtered mBAF values for each sample was generated using the DNACopy R package<sup>[18](#)</sup> with alpha, the parameter for statistical significance, set to 0.01. A minimum consistency matrix was obtained by merging the segmentations from all samples to the shortest possible segments. Segments consisting of less than 10 probes were removed. The

filtered minimum consistency matrix was used for the further analysis of all samples. Data were processed and analysed by DE and PM.

### **Detection of allelic imbalance**

In each sample  $s$ , we defined  $Norm_s$  the mean value for allelic balance (same number of A and B alleles) as the first mode of the kernel density estimate of all segment means, weighted by the number of SNP probes in each segment. Allelic imbalance was detected by comparing all filtered SNPs in each minimum consistent region to all filtered SNPs in the equivalent segment from the control sample (blood). We used a two-sample t-test to evaluate if the means of the SNP probes mBAF in the segments are different between the tumor and control samples. To account for shifts in the allelic balance mode, we tested the alternative hypothesis that the difference of the means is significantly greater than the difference between  $Norm_s$  from the tumour sample and  $Norm_{blood}$ . A p-value threshold of  $1e^{-5}$  was used to define statistical significance. Data were processed and analysed by DE and PM.

### **Analysis of chromosome 3p signal intensities in patient 001**

The normalized logarithmic signal intensities (log R ratios) of tumour regions with reasonable call rates were smoothed and segmented with the DNACopy R package. The “sdundo” segmentation parameter was set to 2 standard deviations for all regions besides R4. Due to poor segmentation results with this parameter setting, no “sdundo” was chosen for R4 and the significance level “alpha” was set to 0.1 for this tumour region. Standard DNACopy parameters were used for smoothing and

segmentations of log R ratios otherwise. To define strong loss, loss and regions of no copy number loss for each sample separately, we searched for all minima in the weighted density estimate of the log R ratios of each tumour sample and defined all log R ratios smaller than a density minimum at a logR value of approximately -0.5 as strong loss, all logR ratios smaller than a minimum at approximately -0.2 as loss and all higher logR ratios as no copy number loss. Data were processed and analysed by DE and PM.

### **mRNA Expression Analysis**

mRNA Expression profiles from fresh frozen specimens from each region of the primary and metastasis were generated by Affymetrix human Gene 1.0 expression arrays according to the manufacturers protocol and normalized using the RMA method from the oligo R package<sup>19</sup>. The data are publicly available on GEO (accession number GSE31232). The samples were clustered using hierarchical clustering on the normalized expression values of probes corresponding to ccA/ccB prognostic signature genes <sup>20</sup>. Data were processed and analysed by DE and PM.

### **mTOR Functional Analysis**

Full length mTOR cDNA with a C-terminal tGFP tag in the PrecisionShuttle vector was purchased from Origine and the n7292 T>C mutation was introduced with the Agilent QuickChangeXL kit as described in the product literature.

Primer sequences used for QickChange protocol:

Forward primer: CTTGCTGAACTGGAGGCCGATGGACACAAATACCA

Reverse primer : TGGTATTTGTGTCCATCGGCCTCCAGTTCAGCAAG

The entire mutated mTOR cDNA was sequenced to confirm the presence of the mutation and to rule out further mutations. The Caki1 RCC cell line was transiently transfected using Fugene HD (Promega) according to the manufacturer's protocol. 24 hours post-transfection, cells were washed twice in PBS and either starved overnight in serum-free media or returned to complete media. After 48 hours cells were lysed in ice cold lysis buffer (50 mM Tris-HCl (pH 7.4), 150 mM NaCl, 2.5 mM EDTA, 1 % Triton X-100, 0.25 % IPEGAL and 0.25 % Sodium Deoxycholate) supplemented with complete protease inhibitors (Roche) and phosphatase inhibitor cocktail set III (Calbiochem) and cleared by centrifugation. Protein levels were adjusted using Bradford reagent (Biorad) to ensure equal loading. Sample buffer (2 % (w/v) SDS, 200 mM Tris-HCl (pH 6.8) 40 % glycerol, 4% (v/v) 2-mercaptoethanol) was added and the samples were heated prior to resolving by SDS-PAGE. The samples were transferred to PVDF membranes (Millipore). The membranes were incubated with the appropriate antibodies, washed with TRIS buffered saline containing 0.1 % Tween and incubated with horse-radish peroxidase conjugated secondary antibodies. After washing, blots were visualized with Immobilon Western (Millipore). Antibodies against Phospho-S6 Ribosomal Protein (Ser235/236), S6 Ribosomal Protein and phospho-4E-BP1 (Thr37/46) were from Cell Signaling. HRP-conjugated anti-actin was obtained from Sigma. The anti-TurboGFP antibody is from Evrogen. Secondary anti-rabbit

antibodies were from Dako. Experiments were conceived and carried out by MGe, CSa and EG.

### **Regional Ploidy Profiling Analysis**

A 50uM formalin fixed paraffin embedded section of tissue was placed in a microfuge tube and xylene was added to remove the paraffin wax and serially rehydrated through 100%, 95%, 70% and 50% ethanol for 5 minutes at room temperature and washed twice with distilled water. A suspension of nuclei was made by incubating the tissue in a 0.5% pepsin solution (Sigma, UK) prepared in 0.9% saline pH 1.5. Incubation is carried out at 37°C for 30 minutes. The nuclei were washed once with PBS, stained with propidium iodide and analysed using the Calibur 1 FACS machine and CellQuest software (Becton Dickinson). The DNA Index of the aneuploid peak, where present, was calculated as the G1 peak of the aneuploid population divided by the G1 peak of the normal diploid cells. Experiments were conceived and performed by AR.

### **Immunohistochemistry and Functional Analyses**

Rabbit anti-phospho-S6 ribosomal protein (Ser235/236), rabbit anti-trimethyl-histone H3 (Lys36), rabbit anti-phospho-Akt (Ser473) and rabbit anti-phospho-4EBP1 antibodies (Thr37/46) (Cell Signaling: #2211, #9763, #4060, #2855), were used for immunohistochemistry on paraffin sections. Antigens were unmasked by microwaving in Tris-EDTA pH9 (pS6) and citrate pH6 (Lys36, pAkt, 4E-BP) and incubated with primary antibodies at 1:25 (pAkt), 1:50 (pS6), 1:100 (H3K36-3Me) and 1:800 (p4E-BP) respectively. After incubation in biotinylated secondary antibody and

Avidin Biotin Complex, slides were developed in DAB substrate (all from Vector). Experiments were conceived and carried out by MGe, EG, GS and BS-D

### **Validation of candidate somatic mutations**

Candidate mutations were validated and verified using Sanger sequencing technology. Mutations found in genes recurrently altered in RCC and additional mutations chosen randomly from the groups of ubiquitous, shared and private mutations were forwarded for validation. Unless specified otherwise (e.g. for private mutations), routine validation for patient 001 was performed for R3, R4, R9 and M2a and germline DNA from PBMCs. Because of limited DNA availability from PreP and PreM, a limited set of shared mutations was validated (mTOR, SOX9, ALKBH8, SETD2, KDM5C-splice site). For patient 002, routine validation was performed in R3, R4, R7, R9, M and germline DNA from PBMCs. Oligonucleotides were designed to span the mutations using Primer3 software (Rozen & Skaletsky). The genomic region of interest was amplified using the polymerase chain reaction, incorporating Big Dye Terminators (BDT v3.1, Life Technologies) followed by capillary separation on the Applied Biosystems 3730xl Genetic Analyser and manual inspection of all sequencing traces. Experiments were conceived, performed and analysed by AR and GC.

## Supplementary Table 1: Sequencing coverage in patients 001 and 002

Median sequencing depth and percentages of the exon capture kit target region for which a minimal coverage of 10x and 30x has been achieved in each sequenced tumor region.

| Sample                                                                                                                | Median depth | 10x | 30x |
|-----------------------------------------------------------------------------------------------------------------------|--------------|-----|-----|
| patient 001 Germline (blood/PBMCs)                                                                                    | 43x          | 89% | 66% |
| patient 001 PreP                                                                                                      | 74x          | 91% | 79% |
| patient 001 PreM                                                                                                      | 63x          | 91% | 76% |
| patient 001 R1                                                                                                        | 81x          | 95% | 85% |
| patient 001 R2                                                                                                        | 83x          | 92% | 80% |
| patient 001 R3                                                                                                        | 45x          | 89% | 67% |
| patient 001 R4                                                                                                        | 65x          | 89% | 76% |
| patient 001 R5                                                                                                        | 71x          | 88% | 76% |
| patient 001 R6                                                                                                        | 46x          | 88% | 67% |
| patient 001 R7                                                                                                        | 36x          | 88% | 59% |
| patient 001 R8                                                                                                        | 117x         | 96% | 91% |
| patient 001 R9                                                                                                        | 60x          | 90% | 74% |
| patient 001 M1                                                                                                        | 109x         | 96% | 90% |
| patient 001 M2a                                                                                                       | 76x          | 91% | 78% |
| patient 001 M2b                                                                                                       | 49x          | 88% | 68% |
| <b>patient 001 - average of tumor samples</b> (not including Germline and regions excluded from analysis (R6 and R7)) | <b>74x</b>   | -   | -   |
| patient 002 Germline (normal kidney)                                                                                  | 48x          | 87% | 67% |
| patient 002 Germline (blood/PBMCs)                                                                                    | 46x          | 87% | 66% |
| patient 002 R1                                                                                                        | 65x          | 90% | 76% |
| patient 002 R2                                                                                                        | 67x          | 90% | 76% |
| patient 002 R3                                                                                                        | 62x          | 89% | 74% |
| patient 002 R4                                                                                                        | 54x          | 88% | 70% |
| patient 002 R5                                                                                                        | 76x          | 91% | 80% |
| patient 002 R6                                                                                                        | 51x          | 87% | 68% |
| patient 002 R7                                                                                                        | 59x          | 89% | 74% |

|                                                                                                                        |            |     |     |
|------------------------------------------------------------------------------------------------------------------------|------------|-----|-----|
| patient 002 R8                                                                                                         | 58x        | 91% | 74% |
| patient 002 R9                                                                                                         | 67x        | 89% | 75% |
| patient 002 M                                                                                                          | 71x        | 91% | 78% |
| <b>patient 002 - average of tumor samples</b> (not including Germline and regions excluded from analysis (R2, R5, R8)) | <b>61x</b> | -   | -   |



**Supplementary Table 2: Details of 133 somatic mutations identified in patient 001.**

Del = deletion, Ins = insertion, FS = frameshift.

| Gene     | Chrom | Position  | Nucleotide Variant | Amino Acid Change |
|----------|-------|-----------|--------------------|-------------------|
| IL12RB2  | 1     | 67795338  | T>C                | Y>H               |
| BCAS2    | 1     | 115118221 | C>T                | V>I               |
| IFI16    | 1     | 158984570 | A>T                | K>X               |
| FCAMR    | 1     | 207134032 | Del:C              | FS                |
| PLB1     | 2     | 28801019  | T>A                | N>K               |
| ALS2CR12 | 2     | 202216087 | G>T                | P>H               |
| C2orf21  | 2     | 210658553 | C>A                | T>N               |
| VHL      | 3     | 10183769  | Del:AG             | FS                |
| SGOL1    | 3     | 20215857  | A>G                | I>T               |
| KLHL18   | 3     | 47385303  | G>A                | D>N               |
| SSR3     | 3     | 156272853 | T>C                | Q>R               |
| CLCN2    | 3     | 184072353 | Del:C              | FS                |
| WHSC1    | 4     | 1902962   | G>T                | S>I               |
| ATXN1    | 6     | 16306994  | G>A                | P>S               |
| DOPEY1   | 6     | 83848337  | A>C                | K>Q               |
| CCR6     | 6     | 167550439 | T>A                | L>M               |
| INTS1    | 7     | 1512818   | Del:T              | FS                |
| PTPRZ1   | 7     | 121653122 | A>G                | K>R               |
| ZC3HC1   | 7     | 129666125 | G>T                | L>I               |
| EXT1     | 8     | 118816994 | C>G                | Q>H               |
| RALGDS   | 9     | 135984240 | T>C                | I>V               |
| MSRB2    | 10    | 23399206  | Del:A              | FS                |
| EIF4G2   | 11    | 10825745  | Ins:A              | FS                |
| ANO5     | 11    | 22294457  | Del:T              | FS                |
| C11orf68 | 11    | 65685051  | C>T                | G>D               |
| MRPL51   | 12    | 6602286   | Del:AA             | FS                |
| KDM2B    | 12    | 121867936 | G>A                | R>C               |
| TOX4     | 14    | 21966415  | G>C                | P>R               |
| NUSAP1   | 15    | 41667966  | Del:A              | FS                |
| TCF12    | 15    | 57544686  | G>A                | C>Y               |
| ZC3H18   | 16    | 88694377  | Del:T              | FS                |
| DDX52    | 17    | 36002244  | C>G                | A>P               |
| ZNF519   | 18    | 14106244  | T>C                | N>D               |
| AKAP8    | 19    | 15471720  | G>A                | P>L               |
| CYP4F3   | 19    | 15769201  | Del:CCCAAAG        | FS                |
| KIAA0355 | 19    | 34843646  | C>A                | A>E               |
| WDR62    | 19    | 36594487  | T>C                | S>P               |
| KLK4     | 19    | 51412045  | C>T                | D>N               |

|         |    |           |           |             |
|---------|----|-----------|-----------|-------------|
| IGLON5  | 19 | 51827044  | Del:C     | FS          |
| NLRP7   | 19 | 55451315  | A>C       | M>R         |
| MAGEB16 | X  | 35820817  | Del:TGATG | FS          |
| SESN2   | 1  | 28599163  | C>G       | H>Q         |
| CCBL2   | 1  | 89434486  | G>C       | T>S         |
| SETD2   | 3  | 47165518  | Del:GA    | FS          |
| PLRG1   | 4  | 155467287 | Ins:A     | FS          |
| CASP2   | 7  | 143001797 | G>T       | G>V         |
| SSNA1   | 9  | 140084291 | Del:T     | FS          |
| TH      | 11 | 2185608   | C>T       | R>H         |
| PPFIA1  | 11 | 70224166  | T>A       | S>T         |
| CDKN1B  | 12 | 12871131  | Del:G     | FS          |
| WSCD2   | 12 | 108603968 | G>A       | V>M         |
| ZNF780A | 19 | 40581873  | C>T       | C>Y         |
| PPP6R2  | 22 | 50878183  | C>G       | P>A         |
| MTOR    | 1  | 11174383  | A>G       | L>P         |
| UGT2A1  | 4  | 70460968  | C>T       | splice site |
| ABHD11  | 7  | 73151579  | G>A       | A>V         |
| GALNT11 | 7  | 151805164 | G>C       | V>L         |
| RIMBP2  | 12 | 130927064 | C>T       | G>E         |
| PSMD7   | 16 | 74335551  | G>A       | splice site |
| CENPN   | 16 | 81058350  | C>G       | L>V         |
| SOX9    | 17 | 70118864  | C>A       | L>M         |
| NPHS1   | 19 | 36322595  | G>A       | S>F         |
| RBFOX2  | 22 | 36157335  | C>T       | S>N         |
| KDM5C   | X  | 53222717  | Del:C     | FS          |
| KDM5C   | X  | 53222723  | C>G       | E>Q         |
| SATL1   | X  | 84362594  | T>C       | T>A         |
| FLNA    | X  | 153596345 | Del:CCT   | Del:E       |
| ITGB3   | 17 | 45380104  | G>T       | A>S         |
| LATS2   | 13 | 21562148  | C>A       | E>X         |
| DIRAS3  | 1  | 68512683  | C>T       | A>T         |
| NGEF    | 2  | 233791888 | G>T       | S>Y         |
| ZNF493  | 19 | 21606235  | T>G       | I>M         |
| SPATA21 | 1  | 16727227  | G>A       | Q>X         |
| DDX58   | 9  | 32487509  | A>T       | N>K         |
| DAPK1   | 9  | 90317948  | G>C       | C>S         |
| ALKBH8  | 11 | 107424632 | T>A       | E>V         |
| KL      | 13 | 33635697  | Del:C     | FS          |
| ERCC5   | 13 | 103514868 | C>A       | H>N         |
| DIO1    | 1  | 54371785  | Del:AAC   | Del:N       |
| PIAS3   | 1  | 145578718 | C>G       | S>C         |
| MR1     | 1  | 181021644 | A>T       | Q>L         |
| C3orf20 | 3  | 14803014  | G>C       | R>P         |
| SETD2   | 3  | 47161717  | G>A       | P>L         |
| TNIK    | 3  | 170856133 | Del:T     | FS          |

|              |    |           |                       |             |
|--------------|----|-----------|-----------------------|-------------|
| LIAS         | 4  | 39466770  | Del:A                 | FS          |
| FBXO1        | 5  | 41934124  | G>C                   | splice site |
| AKAP9        | 7  | 91690733  | G>C                   | E>Q         |
| ITIH5        | 10 | 7621865   | C>A                   | R>L         |
| WDR24        | 16 | 735684    | G>A                   | A>V         |
| MYH8         | 17 | 10299657  | T>G                   | E>A         |
| TOM1         | 22 | 35723300  | Del:G                 | FS          |
| SBF1         | 22 | 50900272  | G>T                   | L>M         |
| KDM5C        | X  | 53228342  | T>A                   | splice site |
| USP51        | X  | 55514714  | C>G                   | W>S         |
| NAP1L3       | X  | 92928275  | G>A                   | S>L         |
| ADAMTSL<br>4 | 1  | 150532548 | DeL:AGGAC             | FS          |
| DUSP12       | 1  | 161719926 | T>G                   | L>W         |
| SLC2A12      | 6  | 134328018 | A>G                   | FS          |
| RAB27A       | 15 | 55497741  | T>A                   | L>F         |
| CIB2         | 15 | 78416057  | Del:C                 | FS          |
| RPS8         | 1  | 45241793  | G>T                   | R>L         |
| FAM129B      | 9  | 130271358 | C>A                   | C>F         |
| PHF21B       | 22 | 45312250  | G>T                   | S>R         |
| HDAC6        | X  | 48675014  | C>A                   | L>M         |
| MAP3K6       | 1  | 27688199  | G>T                   | C>X         |
| MAMLD1       | X  | 149671727 | T>G                   | W>G         |
| RLF          | 1  | 40703301  | G>A                   | R>Q         |
| DNMT3A       | 2  | 25523017  | C>A                   | K>N         |
| HMG20A       | 15 | 77770822  | A>C                   | T>P         |
| ZNF521       | 18 | 22805039  | T>A                   | H>L         |
| MMAB         | 12 | 109998874 | G>T                   | C>X         |
| DACH2        | X  | 86071070  | A>G                   | N>S         |
| SLC2A1       | 1  | 43394624  | DEL:catga<6>ca<br>caa |             |
| TM7SF4       | 8  | 105361447 | G>A                   | V>I         |
| ANKRD26      | 10 | 27326806  | C>G                   | L>F         |
| CD44         | 11 | 35231528  | G>C                   | Q>H         |
| KRT4         | 12 | 53202570  | C>T                   | R>H         |
| KIAA1267     | 17 | 44116456  | G>C                   | P>A         |
| C3           | 19 | 6713210   | G>C                   | I>M         |
| ADAMTS1<br>0 | 19 | 8668659   | C>T                   | R>H         |
| IFNAR1       | 21 | 34717554  | G>A                   | E>K         |
| BCL11A       | 2  | 60688070  | C>A                   | W>C         |
| PLCL1        | 2  | 198948857 | Del:A                 | FS          |
| SETD2        | 3  | 47059231  | T>A                   | splice site |
| KIAA1524     | 3  | 108285373 | Del:A                 | FS          |
| NRAP         | 10 | 115412717 | T>A                   | K>X         |
| HPS5         | 11 | 18306944  | Del:G                 | FS          |
| DIXDC1       | 11 | 111888597 | Del:T                 | FS          |

|         |    |           |                      |     |
|---------|----|-----------|----------------------|-----|
| LAMA3   | 18 | 21533020  | T>C                  | I>T |
| CDH19   | 18 | 64235921  | G>T                  | N>K |
| SUPT6H  | 17 | 27018057  | Del:GGACAATTC<br>CCT | FS  |
| WDR7    | 18 | 54444053  | Del:CT               | FS  |
| C2orf85 | 2  | 242814354 | T>G                  | V>G |

### Supplementary Table 3: Frequencies of 127 somatic mutations characterized by the ultra-deep sequencing of regions R4 and R9 in patient 001.

Del = deletion, Ins = insertion, FS = frameshift. Regions containing more than 1% variant reads were called positive for the detected variant. The VHL mutation could not be analyzed by Next Generation Sequencing due to low coverage in the related region.

| Gene     | Chrom | Position  | Variant | R4 Variant reads | R4 Total reads | R4 Percentage of mutant reads | R9 Variant reads | R9 Total reads | R9 Percentage of mutant reads |
|----------|-------|-----------|---------|------------------|----------------|-------------------------------|------------------|----------------|-------------------------------|
| IL12RB2  | 1     | 67795338  | T>C     | 145              | 466            | 31.12%                        | 129              | 431            | 29.93%                        |
| BCAS2    | 1     | 115118221 | C>T     | 87               | 293            | 29.69%                        | 93               | 301            | 30.90%                        |
| IFI16    | 1     | 158984570 | A>T     | 140              | 451            | 31.04%                        | 175              | 697            | 25.11%                        |
| FCAMR    | 1     | 207134032 | Del:C   | 131              | 482            | 27.18%                        | 117              | 561            | 20.86%                        |
| PLB1     | 2     | 28801019  | T>A     | 15               | 74             | 20.27%                        | 26               | 87             | 29.89%                        |
| ALS2CR12 | 2     | 202216087 | G>T     | 26               | 87             | 29.89%                        | 21               | 92             | 22.83%                        |
| C2orf21  | 2     | 210658553 | C>A     | 135              | 450            | 30.00%                        | 118              | 390            | 30.26%                        |
| SGOL1    | 3     | 20215857  | A>G     | 176              | 617            | 28.53%                        | 185              | 632            | 29.27%                        |
| KLHL18   | 3     | 47385303  | G>A     | 69               | 158            | 43.67%                        | 66               | 172            | 38.37%                        |
| CLCN2    | 3     | 184072350 | Del:C   | 30               | 140            | 21.43%                        | 26               | 132            | 19.70%                        |
| WHSC1    | 4     | 1902962   | G>T     | 69               | 224            | 30.80%                        | 50               | 173            | 28.90%                        |
| ATXN1    | 6     | 16306994  | G>A     | 113              | 412            | 27.43%                        | 98               | 391            | 25.06%                        |
| DOPEY1   | 6     | 83848337  | A>C     | 140              | 420            | 33.33%                        | 106              | 461            | 22.99%                        |
| CCR6     | 6     | 167550439 | T>A     | 178              | 537            | 33.15%                        | 160              | 526            | 30.42%                        |
| INTS1    | 7     | 1512818   | Del:T   | 30               | 100            | 30.00%                        | 29               | 249            | 11.65%                        |
| PTPRZ1   | 7     | 121653122 | A>G     | 251              | 796            | 31.53%                        | 505              | 1121           | 45.05%                        |
| ZC3HC1   | 7     | 129666125 | G>T     | 77               | 229            | 33.62%                        | 119              | 263            | 45.25%                        |
| EXT1     | 8     | 118816994 | C>G     | 122              | 380            | 32.11%                        | 151              | 452            | 33.41%                        |
| RALGDS   | 9     | 135984240 | T>C     | 24               | 62             | 38.71%                        | 32               | 67             | 47.76%                        |
| MSRB2    | 10    | 23399206  | Del:A   | 105              | 317            | 33.12%                        | 51               | 289            | 17.65%                        |
| EIF4G2   | 11    | 10825745  | Ins:A   | 124              | 504            | 24.60%                        | 114              | 408            | 27.94%                        |
| ANO5     | 11    | 22294457  | Del:T   | 170              | 549            | 30.97%                        | 147              | 529            | 27.79%                        |
| C11orf68 | 11    | 65685051  | C>T     | 43               | 132            | 32.58%                        | 28               | 143            | 19.58%                        |
| MRPL51   | 12    | 6602286   | Del:AA  | 62               | 171            | 36.26%                        | 49               | 157            | 31.21%                        |
| KDM2B    | 12    | 121867936 | G>A     | 143              | 413            | 34.62%                        | 87               | 403            | 21.59%                        |
| TOX4     | 14    | 21966415  | G>C     | 48               | 179            | 26.82%                        | 57               | 149            | 38.26%                        |
| NUSAP1   | 15    | 41667966  | Del:A   | 196              | 641            | 30.58%                        | 122              | 489            | 24.95%                        |
| TCF12    | 15    | 57544686  | G>A     | 48               | 187            | 25.67%                        | 48               | 225            | 21.33%                        |
| ZC3H18   | 16    | 88694377  | Del:T   | 117              | 364            | 32.14%                        | 122              | 422            | 28.91%                        |

|          |    |           |             |     |     |        |     |     |        |
|----------|----|-----------|-------------|-----|-----|--------|-----|-----|--------|
| DDX52    | 17 | 36002244  | C>G         | 174 | 539 | 32.28% | 145 | 536 | 27.05% |
| ZNF519   | 18 | 14106244  | T>C         | 142 | 416 | 34.13% | 102 | 261 | 39.08% |
| AKAP8    | 19 | 15471720  | G>A         | 18  | 62  | 29.03% | 10  | 39  | 25.64% |
| CYP4F3   | 19 | 15769201  | Del:CCCAAAG | 68  | 263 | 25.86% | 80  | 301 | 26.58% |
| KIAA0355 | 19 | 34843646  | C>A         | 47  | 116 | 40.52% | 40  | 129 | 31.01% |
| WDR62    | 19 | 36594487  | T>C         | 24  | 84  | 28.57% | 42  | 124 | 33.87% |
| KLK4     | 19 | 51412045  | C>T         | 30  | 123 | 24.39% | 31  | 118 | 26.27% |
| IGLON5   | 19 | 51827044  | Del:C       | 33  | 98  | 33.67% | 30  | 96  | 31.25% |
| NLRP7    | 19 | 55451315  | A>C         | 45  | 136 | 33.09% | 25  | 104 | 24.04% |
| MAGEB16  | X  | 35820817  | Del:TGATG   | 85  | 150 | 56.67% | 93  | 176 | 52.84% |
| SESN2    | 1  | 28599163  | C>G         | 21  | 219 | 9.59%  | 48  | 140 | 34.29% |
| CCBL2    | 1  | 89434486  | G>C         | 46  | 339 | 13.57% | 128 | 442 | 28.96% |
| SETD2    | 3  | 47165518  | Del:GA      | 73  | 403 | 18.11% | 194 | 501 | 38.72% |
| PLRG1    | 4  | 155467287 | Ins:A       | 15  | 299 | 5.02%  | 107 | 330 | 32.42% |
| CASP2    | 7  | 143001797 | G>T         | 43  | 351 | 12.25% | 190 | 397 | 47.86% |
| SSNA1    | 9  | 140084290 | Del:T       | 17  | 140 | 12.14% | 74  | 149 | 49.66% |
| TH       | 11 | 2185608   | C>T         | 4   | 48  | 8.33%  | 21  | 70  | 30.00% |
| PPFIA1   | 11 | 70224166  | T>A         | 68  | 447 | 15.21% | 116 | 374 | 31.02% |
| CDKN1B   | 12 | 12871131  | Del:G       | 7   | 74  | 9.46%  | 43  | 145 | 29.66% |
| WSCD2    | 12 | 108603968 | G>A         | 7   | 43  | 16.28% | 19  | 102 | 18.63% |
| ZNF780A  | 19 | 40581873  | C>T         | 68  | 467 | 14.56% | 160 | 511 | 31.31% |
| PPP6R2   | 22 | 50878183  | C>G         | 12  | 76  | 15.79% | 20  | 67  | 29.85% |
| MTOR     | 1  | 11174383  | G>A         | 0   | 252 | 0.00%  | 73  | 171 | 42.69% |
| UGT2A1   | 4  | 70460968  | C>T         | 0   | 432 | 0.00%  | 73  | 394 | 18.53% |
| ABHD11   | 7  | 73151579  | C>T         | 1   | 147 | 0.68%  | 66  | 187 | 35.29% |
| GALNT11  | 7  | 151805164 | G>C         | 0   | 147 | 0.00%  | 35  | 169 | 20.71% |
| RIMBP2   | 12 | 130927064 | C>T         | 0   | 303 | 0.00%  | 72  | 351 | 20.51% |
| PSMD7    | 16 | 74335551  | G>A         | 0   | 402 | 0.00%  | 81  | 314 | 25.80% |
| CENPN    | 16 | 81058350  | C>G         | 0   | 292 | 0.00%  | 72  | 212 | 33.96% |
| SOX9     | 17 | 70118864  | C>A         | 0   | 73  | 0.00%  | 72  | 145 | 49.66% |
| NPHS1    | 19 | 36322595  | G>A         | 0   | 70  | 0.00%  | 10  | 34  | 29.41% |
| RBFOX2   | 22 | 36157335  | C>T         | 0   | 287 | 0.00%  | 97  | 326 | 29.75% |
| KDM5C    | X  | 53222717  | Del:C       | 0   | 87  | 0.00%  | 47  | 79  | 59.49% |
| KDM5C    | X  | 53222723  | C>G         | 0   | 87  | 0.00%  | 49  | 78  | 62.82% |
| SATL1    | X  | 84362594  | C>G         | 0   | 221 | 0.00%  | 135 | 236 | 57.20% |
| FLNA     | X  | 153596345 | Del:CCT     | 0   | 169 | 0.00%  | 84  | 198 | 42.42% |
| ITGB3    | 17 | 45380104  | G>T         | 23  | 186 | 12.37% | 0   | 143 | 0.00%  |
| LATS2    | 13 | 21562148  | C>A         | 0   | 548 | 0.00%  | 0   | 387 | 0.00%  |
| DIRAS3   | 1  | 68512683  | C>T         | 0   | 398 | 0.00%  | 0   | 403 | 0.00%  |
| NGEF     | 2  | 233791888 | G>T         | 0   | 23  | 0.00%  | 19  | 63  | 30.16% |
| ZNF493   | 19 | 21606235  | T>G         | 0   | 323 | 0.00%  | 0   | 284 | 0.00%  |

|              |    |               |                       |     |     |        |     |     |            |
|--------------|----|---------------|-----------------------|-----|-----|--------|-----|-----|------------|
| SPATA21      | 1  | 16727227      | G>A                   | 105 | 378 | 27.78% | 0   | 268 | 0.00%      |
| DDX58        | 9  | 32487509      | A>T                   | 111 | 375 | 29.60% | 1   | 338 | 0.30%      |
| DAPK1        | 9  | 90317948      | G>C                   | 70  | 221 | 31.67% | 0   | 190 | 0.00%      |
| ALKBH8       | 11 | 10742463<br>2 | T>A                   | 78  | 271 | 28.78% | 1   | 194 | 0.52%      |
| KL           | 13 | 33635697      | Del:C                 | 91  | 337 | 27.00% | 0   | 256 | 0.00%      |
| ERCC5        | 13 | 10351486<br>8 | C>A                   | 114 | 332 | 34.34% | 0   | 252 | 0.00%      |
| DIO1         | 1  | 54371785      | Del:AAC               | 0   | 162 | 0.00%  | 0   | 129 | 0.00%      |
| PIAS3        | 1  | 14557871<br>8 | C>G                   | 0   | 322 | 0.00%  | 0   | 289 | 0.00%      |
| MR1          | 1  | 18102164<br>4 | A>T                   | 0   | 176 | 0.00%  | 1   | 158 | 0.63%      |
| C3orf20      | 3  | 14803014      | G>C                   | 0   | 280 | 0.00%  | 0   | 262 | 0.00%      |
| SETD2        | 3  | 47161717      | G>A                   | 0   | 273 | 0.00%  | 1   | 317 | 0.32%      |
| TNIK         | 3  | 17085613<br>3 | Del:T                 | 0   | 589 | 0.00%  | 0   | 692 | 0.00%      |
| LIAS         | 4  | 39466770      | Del:A                 | 0   | 551 | 0.00%  | 0   | 506 | 0.00%      |
| FBXO1        | 5  | 41934121      | G>C                   | 0   | 269 | 0.00%  | 0   | 289 | 0.00%      |
| AKAP9        | 7  | 91690733      | G>C                   | 0   | 240 | 0.00%  | 0   | 404 | 0.00%      |
| ITIH5        | 10 | 7621865       | C>A                   | 0   | 169 | 0.00%  | 0   | 158 | 0.00%      |
| WDR24        | 16 | 735684        | G>A                   | 0   | 148 | 0.00%  | 0   | 188 | 0.00%      |
| MYH8         | 17 | 10299657      | T>G                   | 0   | 210 | 0.00%  | 0   | 206 | 0.00%      |
| TOM1         | 22 | 35723300      | Del:G                 | 0   | 157 | 0.00%  | 0   | 151 | 0.00%      |
| SBF1         | 22 | 50900272      | G>T                   | 0   | 100 | 0.00%  | 0   | 106 | 0.00%      |
| KDM5C        | X  | 53228342      | A>T                   | 0   | 147 | 0.00%  | 0   | 149 | 0.00%      |
| USP51        | X  | 55514714      | C>G                   | 0   | 132 | 0.00%  | 0   | 156 | 0.00%      |
| NAP1L3       | X  | 92928275      | G>A                   | 0   | 95  | 0.00%  | 0   | 117 | 0.00%      |
| ADAMTS<br>L4 | 1  | 15053254<br>8 | Del:AGGAC             | 0   | 331 | 0.00%  | 0   | 372 | 0.00%      |
| DUSP12       | 1  | 16171992<br>6 | T>G                   | 0   | 13  | 0.00%  | 0   | 32  | 0.00%      |
| SLC2A12      | 6  | 13432801<br>8 | A>G                   | 0   | 194 | 0.00%  | 1   | 191 | 0.52%      |
| RAB27A       | 15 | 55497741      | T>A                   | 1   | 650 | 0.15%  | 0   | 634 | 0.00%      |
| CIB2         | 15 | 78416057      | Del:C                 | 0   | 246 | 0.00%  | 0   | 183 | 0.00%      |
| RPS8         | 1  | 45241793      | G>T                   | 0   | 60  | 0.00%  | 0   | 141 | 0.00%      |
| FAM129<br>B  | 9  | 13027135<br>8 | C>A                   | 0   | 16  | 0.00%  | 0   | 39  | 0.00%      |
| PHF21B       | 22 | 45312250      | G>T                   | 0   | 26  | 0.00%  | 0   | 39  | 0.00%      |
| HDAC6        | X  | 48675014      | C>A                   | 0   | 35  | 0.00%  | 0   | 32  | 0.00%      |
| MAP3K6       | 1  | 27688199      | G>T                   | 0   | 114 | 0.00%  | 0   | 78  | 0.00%      |
| MAMLD1       | X  | 14967172<br>7 | T>G                   | 0   | 22  | 0.00%  | 0   | 54  | 0.00%      |
| DNMT3A       | 2  | 25523017      | C>A                   | 0   | 29  | 0.00%  | 1   | 52  | 1.92%      |
| ZNF521       | 18 | 22805039      | T>A                   | 3   | 494 | 0.61%  | 0   | 345 | 0.00%      |
| MMAB         | 12 | 10999887<br>4 | G>T                   | 0   | 95  | 0.00%  | 0   | 113 | 0.00%      |
| DACH2        | X  | 86071070      | A>G                   | 0   | 164 | 0.00%  | 0   | 180 | 0.00%      |
| SLC2A1       | 1  | 43394624      | DEL:catga<6>ca<br>caa | 0   | 335 | 0.00%  | 38  | 301 | 12.62<br>% |
| TM7SF4       | 8  | 10536144<br>7 | G>A                   | 0   | 407 | 0.00%  | 139 | 464 | 29.96<br>% |
| ANKRD2<br>6  | 10 | 27326806      | C>G                   | 0   | 250 | 0.00%  | 61  | 245 | 24.90<br>% |
| CD44         | 11 | 35231528      | G>C                   | 0   | 520 | 0.00%  | 124 | 554 | 22.38<br>% |
| KRT4         | 12 | 53202570      | C>T                   | 1   | 389 | 0.26%  | 88  | 424 | 20.75<br>% |
| KIAA126<br>7 | 17 | 44116456      | G>C                   | 0   | 315 | 0.00%  | 30  | 175 | 17.14<br>% |

|              |    |               |                       |     |      |        |     |      |            |
|--------------|----|---------------|-----------------------|-----|------|--------|-----|------|------------|
| C3           | 19 | 6713210       | G>C                   | 0   | 149  | 0.00%  | 45  | 172  | 26.16<br>% |
| ADAMTS<br>10 | 19 | 8668659       | C>T                   | 0   | 118  | 0.00%  | 35  | 70   | 50.00<br>% |
| IFNAR1       | 21 | 34717554      | G>A                   | 0   | 694  | 0.00%  | 155 | 780  | 19.87<br>% |
| BCL11A       | 2  | 60688070      | C>A                   | 13  | 81   | 16.05% | 1   | 176  | 0.57%      |
| PLCL1        | 2  | 19894885<br>7 | Del:A                 | 101 | 558  | 18.10% | 0   | 624  | 0.00%      |
| SETD2        | 3  | 47059231      | A>T                   | 33  | 154  | 21.43% | 0   | 155  | 0.00%      |
| KIAA152<br>4 | 3  | 10828537<br>3 | Del:A                 | 114 | 724  | 15.75% | 0   | 849  | 0.00%      |
| NRAP         | 10 | 11541271<br>7 | T>A                   | 64  | 341  | 18.77% | 0   | 395  | 0.00%      |
| LAMA3        | 18 | 21533020      | T>C                   | 95  | 509  | 18.66% | 0   | 372  | 0.00%      |
| CDH19        | 18 | 64235921      | G>T                   | 85  | 367  | 23.16% | 1   | 343  | 0.29%      |
| SUPT6H       | 17 | 27018057      | Del:GGACAATTTC<br>CCT | 0   | 107  | 0.00%  | 0   | 93   | 0.00%      |
| WDR7         | 18 | 54444053      | Del:CT                | 0   | 1037 | 0.00%  | 0   | 1004 | 0.00%      |
| C2orf85      | 2  | 24281435<br>4 | T>G                   | 3   | 42   | 7.14%  | 0   | 78   | 0.00%      |

#### Supplementary Table 4: Details of 119 somatic mutations identified in patient 002.

Del = deletion, Ins = insertion, FS = frameshift.

| Gene     | Chromosome | Position      | Nucleotide Variant | Amino Acid Change |
|----------|------------|---------------|--------------------|-------------------|
| CCDC14   | 3          | 1236801<br>48 | G>C                | R>P               |
| CLEC3B   | 3          | 4507705<br>0  | C>A                | C>X               |
| DNHD1    | 11         | 6568627       | G>C                | W>S               |
| FOXK2    | 17         | 8054500<br>3  | G>T                | Q>H               |
| FUBP3    | 9          | 1334883<br>88 | C>A                | S>Y               |
| GOLGA6D  | 15         | 7558674<br>8  | G>A                | G>S               |
| KRT33B   | 17         | 3952588<br>4  | A>C                | N>T               |
| MPHOSPH8 | 13         | 2024534<br>4  | A>T                | splice site       |
| MYC      | 8          | 1287529<br>25 | C>T                | S>S               |
| PACS1    | 11         | 6600339<br>0  | G>A                | Q>Q               |
| PBRM1    | 3          | 5266875<br>1  | Ins:A              | FS                |
| PCDH15   | 10         | 5578271<br>0  | Del:G              | FS                |
| PCDHB4   | 5          | 1405025<br>41 | A>G                | T>A               |
| POFUT2   | 21         | 4670334<br>6  | C>T                | P>L               |
| POLG2    | 17         | 6248185<br>2  | A>C                | H>P               |
| POLI     | 18         | 5182011       | G>A                | R>K               |



|            |    |               |          |             |
|------------|----|---------------|----------|-------------|
|            |    | 3             |          |             |
| PPP1R1B    | 17 | 3779190<br>5  | A>T      | E>V         |
| REG3G      | 2  | 7925493<br>5  | C>A      | G>G         |
| SEC24A     | 5  | 1340025<br>15 | C>G      | P>A         |
| SPNS1      | 16 | 2899419<br>0  | A>G      | I>V         |
| SUN2       | 22 | 3913459<br>3  | T>A      | F>Y         |
| THSD1      | 13 | 5297160<br>8  | G>A      | V>V         |
| TNKS1BP1   | 11 | 5707654<br>2  | G>A      | E>K         |
| TTN        | 2  | 1795966<br>25 | G>A      | E>E         |
| VHL        | 3  | 1019151<br>3  | Del:T    | FS          |
| ZEB1       | 10 | 3179971<br>8  | T>G      | F>C         |
| ZNF14      | 19 | 1982312<br>4  | Del:A    | FS          |
| SLFN5      | 17 | 3359210<br>1  | Del:A    | FS          |
| ATXN3      | 14 | 9254880<br>2  | A>T      | K>I         |
| ENPP5      | 6  | 4613589<br>1  | G>A      | G>R         |
| RAI2       | X  | 1781942<br>1  | Del:AT   | FS          |
| SCNN1G     | 16 | 2322347<br>4  | T>A      | splice site |
| VARS       | 6  | 3176080<br>5  | T>C      | A>A         |
| LCT        | 2  | 1365946<br>24 | Ins:A    | FS          |
| VPS13A     | 9  | 7995453<br>6  | C>T      | L>L         |
| PCLO       | 7  | 8276369<br>6  | C>G      | S>X         |
| SETD2      | 3  | 4714299<br>7  | Ins:CTTC | FS          |
| AP001107.2 | 11 | 6611444<br>7  | Del:G    | FS          |
| CCT3       | 1  | 1563045<br>39 | Del:C    | FS          |
| NUP62      | 19 | 5041277<br>2  | A>G      | N>S         |
| RNF8       | 6  | 3733668<br>9  | T>A      | F>I         |
| SLC22A7    | 6  | 4326629<br>4  | G>T      | E>D         |
| MYBPC1     | 12 | 1020550<br>18 | C>T      | Y>Y         |
| FLG        | 1  | 1522866<br>68 | C>A      | H>N         |
| AGER       | 6  | 3215094       | C>A      | P>H         |

|                     |    |               |         |             |
|---------------------|----|---------------|---------|-------------|
|                     |    | 7             |         |             |
| ARHGEF7             | 13 | 1119553<br>83 | C>T     | R>C         |
| DCLRE1A             | 10 | 1156070<br>83 | A>C     | T>P         |
| KIAA1549            | 7  | 1385938<br>68 | G>A     | splice site |
| PTEN                | 10 | 8968531<br>5  | Del:G   | splice site |
| TTC15               | 2  | 3428416       | G>T     | V>L         |
| POLG                | 15 | 8986181<br>1  | G>A     | R>H         |
| CNTN2               | 1  | 2050412<br>37 | G>A     | A>T         |
| FAM86A              | 16 | 5143514       | C>A     | R>R         |
| TNR                 | 1  | 1753554<br>22 | C>T     | T>M         |
| ADAL                | 15 | 4363253<br>0  | C>T     | P>L         |
| HSPA14              | 10 | 1489181<br>1  | G>A     | splice site |
| PVRL4               | 1  | 1610590<br>28 | Del:AGC | Del:L       |
| KDM5D               | Y  | 2187729<br>0  | G>T     | V>L         |
| SNORD55             | 1  | 4524173<br>6  | G>A     | R>H         |
| TRIO                | 5  | 1435958<br>9  | C>G     | I>M         |
| TNIK                | 3  | 1711778<br>19 | G>T     | E>X         |
| WWC2                | 4  | 1842019<br>96 | Del:AAG | Del:E       |
| CAPN14              | 2  | 3142484<br>5  | G>T     | W>L         |
| TNXB                | 6  | 3206351<br>3  | Del:AC  | FS          |
| ENSG00000251<br>322 | 22 | 5111706<br>8  | C>T     | A>V         |
| BCL7A               | 12 | 1224686<br>62 | C>A     | P>H         |
| SYNM                | 15 | 9967279<br>8  | G>A     | T>T         |
| MLLT4               | 6  | 1683525<br>22 | G>T     | TT          |
| NADSYN1             | 11 | 7117450<br>8  | C>A     | N>K         |
| MERTK               | 2  | 1127863<br>14 | C>T     | P>L         |
| GRIK5               | 19 | 4254681<br>7  | C>T     | L>L         |
| TRIM71              | 3  | 3293286<br>8  | C>G     | I>M         |
| PTCHD3              | 10 | 2770241<br>3  | C>T     | A>V         |
| ZFHX4               | 8  | 7776542<br>6  | C>T     | A>V         |

|          |    |               |         |             |
|----------|----|---------------|---------|-------------|
| TXLNB    | 6  | 1395815<br>46 | Del:TC  | FS          |
| OBP2A    | 9  | 1384397<br>76 | T>A     | Y>N         |
| OR10H3   | 19 | 1585240<br>8  | T>G     | I>S         |
| PARP8    | 5  | 5009083<br>0  | C>A     | S>X         |
| NAP1L5   | 4  | 8961848<br>4  | Del:TCC | Del:E       |
| LRRC31   | 3  | 1695579<br>57 | G>A     | R>Q         |
| KIAA0146 | 8  | 4830902<br>1  | C>G     | S>C         |
| GPR98    | 5  | 9007383<br>1  | G>A     | E>K         |
| CPVL     | 7  | 2910373<br>1  | A>C     | E>D         |
| DNAJC27  | 2  | 2519009<br>0  | G>T     | G>X         |
| DPYSL4   | 10 | 1340138<br>88 | C>A     | T>T         |
| LPHN2    | 1  | 8240943<br>8  | C>G     | P>A         |
| ITGA6    | 2  | 1733339<br>74 | G>A     | G>E         |
| PTEN     | 10 | 8972505<br>1  | T>A     | L>Q         |
| COL2A1   | 12 | 4837092<br>0  | G>T     | G>X         |
| FARP1    | 13 | 9904591<br>3  | C>A     | H>N         |
| GRHL1    | 2  | 1013911<br>4  | C>A     | P>T         |
| IQCA1    | 2  | 2372532<br>39 | A>T     | E>D         |
| KIAA0892 | 19 | 1946516<br>6  | G>T     | E>D         |
| MGA      | 15 | 4205893<br>2  | G>A     | L>3L        |
| NPHP4    | 1  | 6038367       | C>T     | P>L         |
| TRRAP    | 7  | 9858177<br>4  | G>A     | M>I         |
| ZBTB46   | 20 | 6242140<br>7  | C>T     | P>L         |
| SLC40A1  | 2  | 1904400<br>38 | Del:C   | FS          |
| DCX      | X  | 1106533<br>64 | C>T     | T>M         |
| ADAM12   | 10 | 1277379<br>76 | G>A     | R>Q         |
| C9orf102 | 9  | 9868458<br>6  | G>C     | splice site |
| HAAO     | 2  | 4299694<br>8  | G>T     | E>X         |
| RBBP6    | 16 | 2458030<br>7  | Ins:T   | FS          |
| SFXN5    | 2  | 7329879       | Del:GCC | Del:A       |

|         |    |               |     |     |
|---------|----|---------------|-----|-----|
|         |    | 7             |     |     |
| SPTAN1  | 9  | 1313955<br>64 | C>A | P>H |
| ENDOU   | 12 | 4811016<br>0  | C>T | A>V |
| TRIP11  | 14 | 9246574<br>3  | A>G | N>S |
| TOP1    | 20 | 3974684<br>8  | G>A | R>H |
| TP53    | 17 | 7577539       | C>T | R>W |
| SETD2   | 3  | 4715820<br>4  | T>C | C>R |
| SFRS6   | 20 | 4208868<br>2  | C>T | R>X |
| ST8SIA1 | 12 | 2244015<br>9  | G>A | G>E |
| PGK1    | X  | 7737283<br>3  | G>C | E>Q |
| NOL11   | 17 | 6571873<br>8  | T>A | I>I |
| GPR126  | 6  | 1427250<br>60 | A>C | I>L |
| GPR149  | 3  | 1541465<br>93 | C>A | S>Y |
| DNAH2   | 17 | 7681656       | C>T | P>S |
| ATP11A  | 13 | 1134811<br>46 | G>A | E>K |
| EMP1    | 12 | 1336641<br>8  | G>A | W>X |

## **Supplementary Figure Legends**

### **Supplementary Figure 1: Regional validation of mutations**

#### **identified by multi-region exome sequencing in patient 001**

The figure shows 37 mutations validated using Sanger sequencing.

Mutations have been characterised and validated, in most cases, from tumour regions R3, R4, R9, M2a and germline (blood/PBMC) DNA.

Mutations are indicated with an arrow. Note that KDM5C\_2 shows two distinct mutations. Five genes DIXDC1, HPS5, HMG20A, RLF and SSR3 did not validate after Sanger sequencing, results not shown.

### **Supplementary Figure 2: Variant frequencies for R4 in ultra-deep sequencing data.**

Each segment represents a mutation detected in R4 (radius = proportional to percentage of variant reads).

### **Supplementary Figure 3: Patient 001 phylogenetic tree based on synonymous and non-coding mutations.**

We performed an exploratory analysis of heterogeneous synonymous and non-coding point mutations which are unlikely to be biased by selection pressures to reveal regional differences in the mutation spectrum and the overall mutational load of tumor 001. After clonal ordering, a phylogenetic tree was constructed which demonstrates similar ancestral relationships as the non-synonymous analysis (Figure 1C) with different branch lengths.

There was no significant difference in the mutations spectra in branch 1 vs. branch 2 with predominating G:C>A:T substitutions in 41% and 50%,  
30

respectively, indicating that the mechanism of mutation generation may be identical in these main branches. An average of 2 synonymous mutations were detected per non-synonymous mutation in the main branch 1 and its sub-branches and an average of 1.5 synonymous mutations per non-synonymous mutation in the main branch 2 and sub-branches. Regions in branch 2 are tetraploid/aneuploid compared to diploid regions in branch 1. This may indicate that an increase in ploidy renders cancer cells more tolerant to non-synonymous mutations which are more likely to be detrimental to fitness. Larger series will be required to investigate whether polyploidy confers a selective advantage through such a buffer effect, limiting clonal extinction due to the accumulation of unfavorable mutations in genomically unstable cancer cells or those treated with DNA damaging agents.

#### **Supplementary Figure 4: Somatic mutations by regions.**

Different sample collection times are shown.

#### **Supplementary Figure 5: Patient 001 SNP array data analysis.**

**A:** Allelic imbalance (AI): red (metastatic sites) and blue (primary tumor sites) markers highlight chromosomal sections where AI was detected. **B:** Regional segmented probe intensities from the chromosome 3p from tumor 001. Sections with decreased intensity correspond to the sections of reported allelic imbalance and to the localizations of the VHL and SETD2 genes, strongly suggesting LOH in these sections. Dark blue, light blue and grey highlight SNPs present in sections of strong loss, loss and no copy number change, respectively.

### **Supplementary Figure 6: Immunohistochemical staining for H3K36me3 in patient 001.**

Positive control: ccRCC sample with wild type (WT) SETD2. Black arrows: tumor cells, White arrows: stromal cells.

### **Supplementary Figure 7: Alignment of mTOR to PI3K-beta and the secondary structure for PI3K-beta (PDB code 2Y3A).**

The mTOR repressor region (residues 2430-2450) is shown as a black bar.

### **Supplementary Figure 8: Regional validation of mutations identified by multi-region exome sequencing in patient 002**

The figure shows 20 mutations validated using Sanger sequencing. Mutations have been characterised and validated, in most cases, from tumour regions R3, R4, R7, R9, M and germline (blood/PBMC) DNA. Mutations are indicated with an arrow. GRHL1 did not validate after Sanger sequencing and results are not shown.

### **Supplementary Figure 9: Somatic mutations in patient 002**

Number of ubiquitous, shared and private mutations in samples analyzed with exome sequencing in patient 002.

### **Supplementary Figure 10: Ploidy profiles of patients 002-004**

Ploidy profiles of each region in patients 002, 003 and 004. No sufficient data points were obtained to reliably estimate the ploidy of regions R1 and R8 from patient 002, region R1 from patient 003 and region R5 from patient 004.

### **Supplementary Figure 11: Allelic imbalance (AI) in patients 002, 003 and 004.**

Blue markers highlight chromosomal sections where AI was detected.

### **Supplementary Figure 12: Immunohistochemical detection of Histone H3K36 methylation status in patient 001**

Representative H3K36me3 staining of tumor cells (black arrows) from regions bearing different SETD2 mutations (R4 and M). Strong positive staining is seen in stromal cells (white arrows).

### **Supplementary Figure 13: Phospho-Akt staining for PTEN activity in patient 002.**

Representative phospho-Akt (Ser473) staining of tumor regions with wild type (WT) PTEN (R4), PTEN carrying a missense (R7) or splice-site mutation (R10).

### **Supplementary Figure 14: Immunohistochemical detection of Histone H3K36 methylation status in patient 004**

**A:** Representative H3K36me3 staining in tumour cells from regions with either wild type SETD2 (R4) or SETD2 containing a frame shift mutation (R6) in patient 004. **B:** Electropherograms showing wild type SETD2 (R4 and blood) and a frame shift mutation (R6) in patient 004. Investigation of the mutation was performed using Sanger sequencing.



## References

1. Agilent SureSelect protocol. [http://www.chem.agilent.com/Library/usermanuals/Public/g3362-90001\\_sureselect\\_illuminahumanallexon\\_2.3.pdf](http://www.chem.agilent.com/Library/usermanuals/Public/g3362-90001_sureselect_illuminahumanallexon_2.3.pdf). In.
2. Gnirke A, Melnikov A, Maguire J, et al. Solution hybrid selection with ultra-long oligonucleotides for massively parallel targeted sequencing. *Nature biotechnology* 2009;27:182-9.
3. Tewhey R, Nakano M, Wang X, et al. Enrichment of sequencing targets from the human genome by solution hybridization. *Genome Biol* 2009;10:R116.
4. TruSeq Cluster Generation v5 protocol. <https://icom.illumina.com/download/summary/m3k7sKMtGEOX1RjuSLQzjQ> In.
5. Bentley DR. Whole-genome re-sequencing. *Curr Opin Genet Dev* 2006;16:545-52.
6. Bentley DR, Balasubramanian S, Swerdlow HP, et al. Accurate whole human genome sequencing using reversible terminator chemistry. *Nature* 2008;456:53-9.
7. TruSeq GAllx SBS v5 reagent protocol. [https://icom.illumina.com/download/summary/PRv\\_NCP-DEaVrFfTbSdQnw](https://icom.illumina.com/download/summary/PRv_NCP-DEaVrFfTbSdQnw) In.
8. Varela I, Tarpey P, Raine K, et al. Exome sequencing identifies frequent mutation of the SWI/SNF complex gene PBRM1 in renal carcinoma. *Nature* 2011;469:539-42.
9. Li H, Durbin R. Fast and accurate short read alignment with Burrows-Wheeler transform. *Bioinformatics* 2009;25:1754-60.
10. Li H, Handsaker B, Wysoker A, et al. The Sequence Alignment/Map format and SAMtools. *Bioinformatics* 2009;25:2078-9.
11. Goya R, Sun MG, Morin RD, et al. SNVMix: predicting single nucleotide variants from next-generation sequencing of tumors. *Bioinformatics* 2010;26:730-6.
12. dbSNP. <http://www.ncbi.nlm.nih.gov/projects/SNP/>. In.
13. R: A Language and Environment for Statistical Computing, R Foundation for Statistical Computing. <http://www.R-project.org/>. In.
14. Morgan M, Anders S, Lawrence M, Aboyoun P, Pages H, Gentleman R. ShortRead: a bioconductor package for input, quality assessment and exploration of high-throughput sequence data. *Bioinformatics* 2009;25:2607-8.
15. Nakamura K, Oshima T, Morimoto T, et al. Sequence-specific error profile of Illumina sequencers. *Nucleic Acids Res* 2011;39:e90.
16. Merlo LM, Pepper JW, Reid BJ, Maley CC. Cancer as an evolutionary and ecological process. *Nat Rev Cancer* 2006;6:924-35.
17. Staaf J, Lindgren D, Vallon-Christersson J, et al. Segmentation-based detection of allelic imbalance and loss-of-heterozygosity in cancer cells using whole genome SNP arrays. *Genome Biol* 2008;9:R136.
18. Venkatraman ES, Olshen AB. A faster circular binary segmentation algorithm for the analysis of array CGH data. *Bioinformatics* 2007;23:657-63.
19. Irizarry RA, Hobbs B, Collin F, et al. Exploration, normalization, and summaries of high density oligonucleotide array probe level data. *Biostatistics (Oxford, England)* 2003;4:249-64.
20. Brannon AR, Reddy A, Seiler M, et al. Molecular Stratification of Clear Cell Renal Cell Carcinoma by Consensus Clustering Reveals Distinct Subtypes and Survival Patterns. *Genes Cancer* 2010;1:152-63.



Supplementary Figure 1

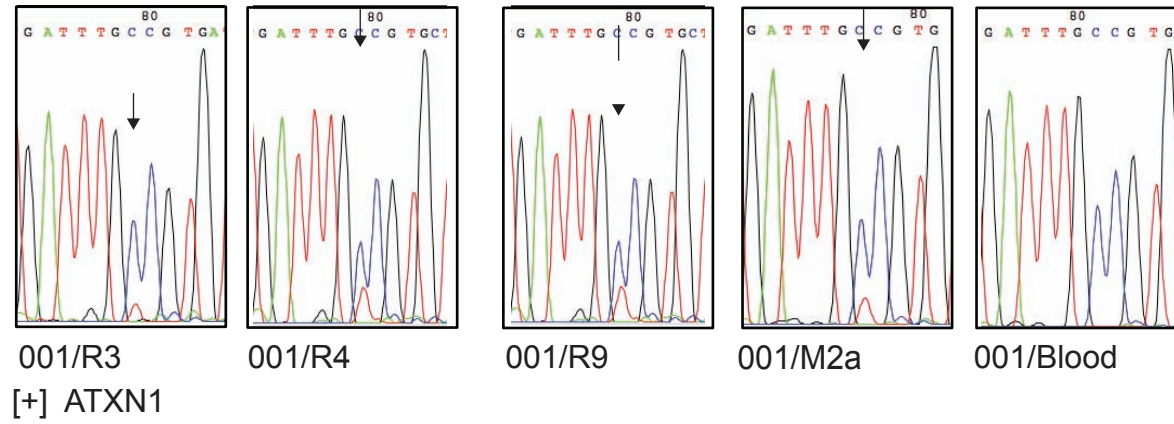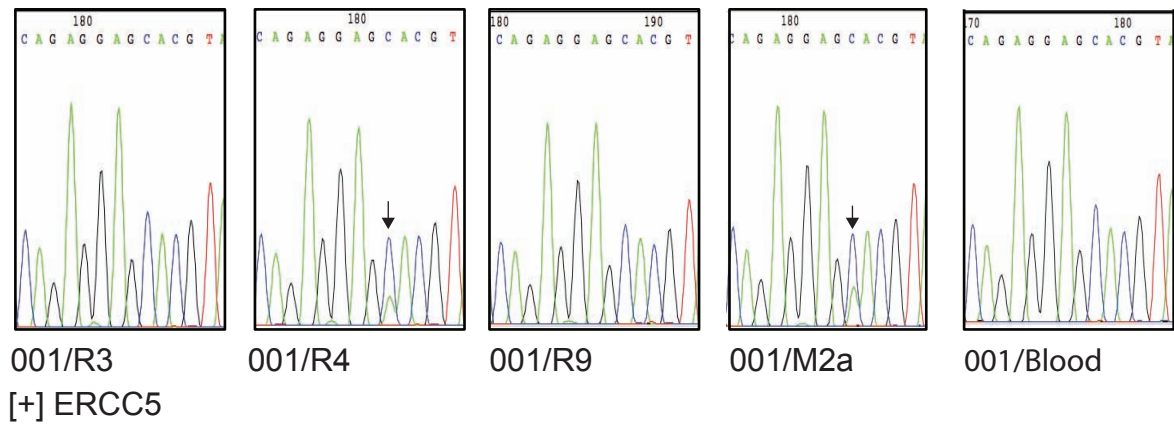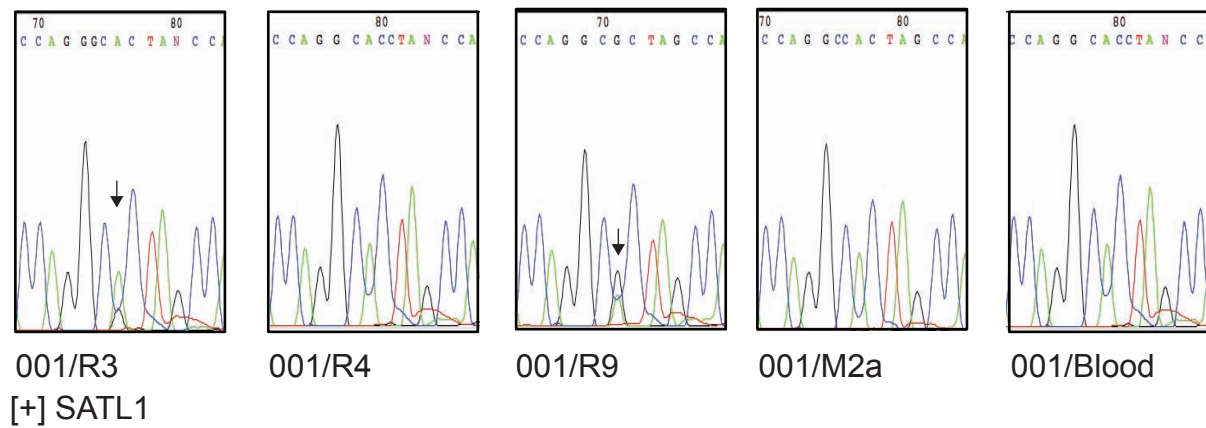

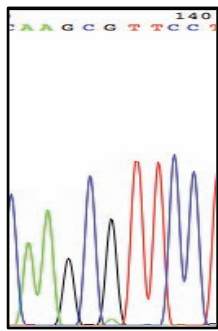

001/R3  
[+] ADAMTS10

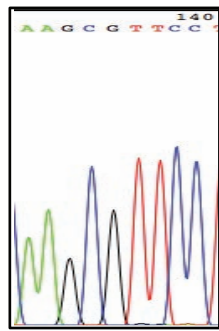

001/R4

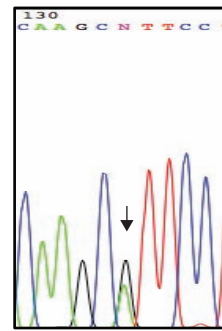

001/R9

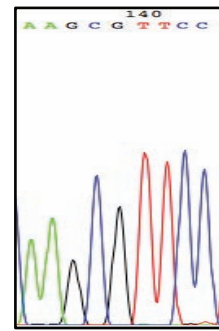

001/M2a

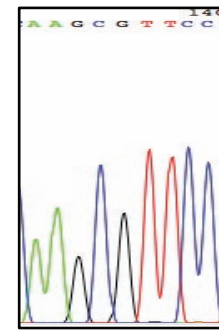

001/Blood

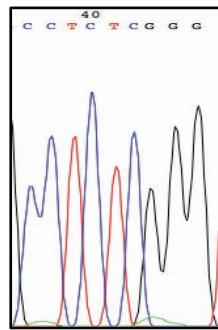

001/R3  
[-] ITIH5

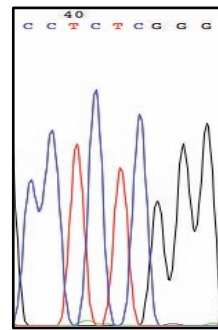

001/R4

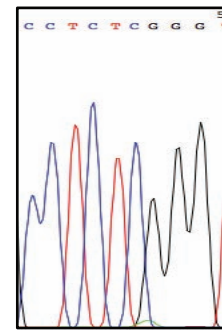

001/R9

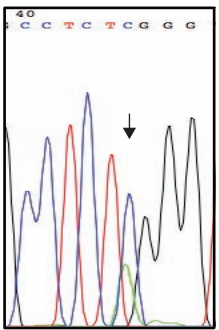

001/M2a

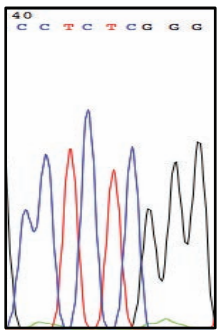

001/Blood

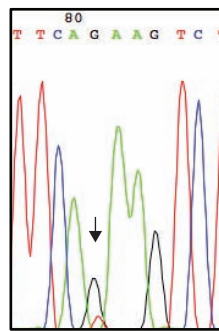

001/R3  
[-] SOX9

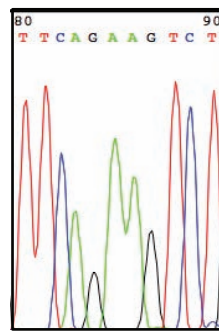

001/R4

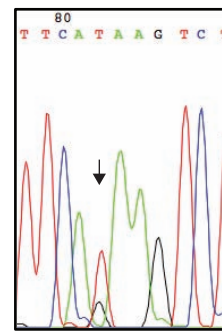

001/R9

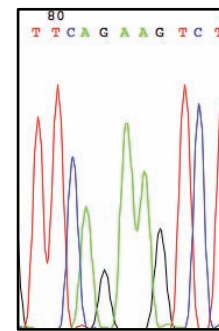

001/M2a

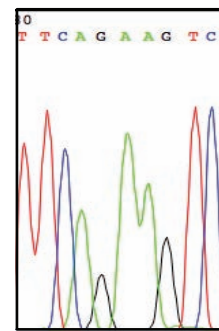

001/Blood

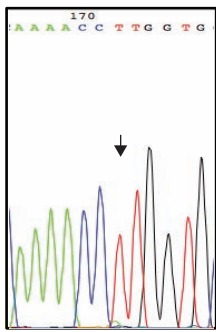

001/R3  
CCR6

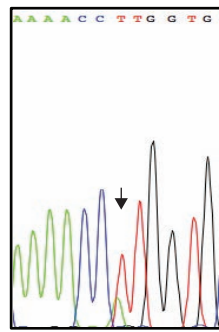

001/R4

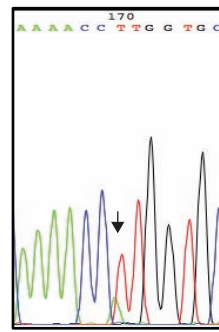

001/R9

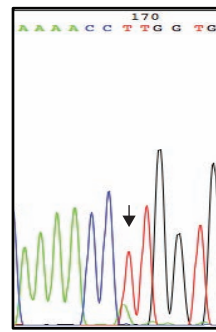

001/M2a

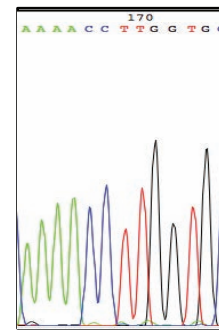

001/Blood

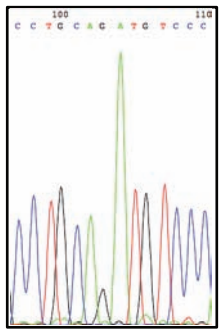

001/R3

[-] SETD2 (2)

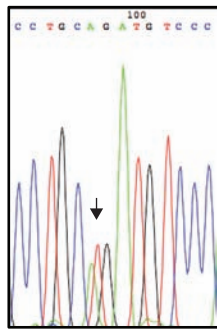

001/R4

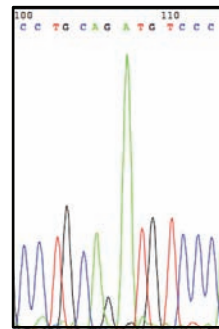

001/R9

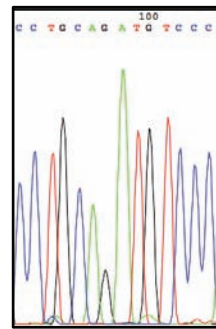

001/M2a

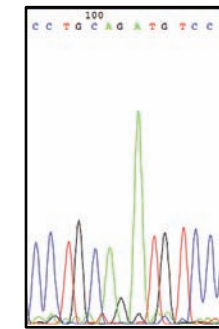

001/Blood

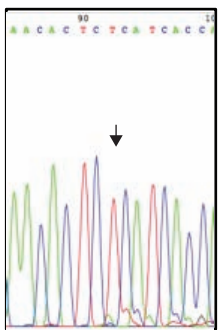

001/R3

[+] SETD2 (3)

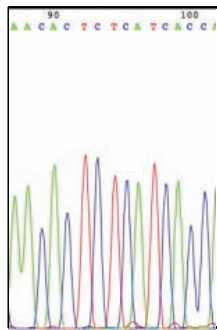

001/R4

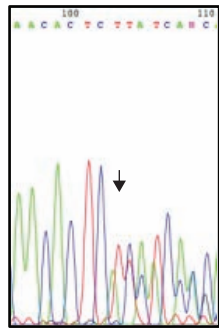

001/R9

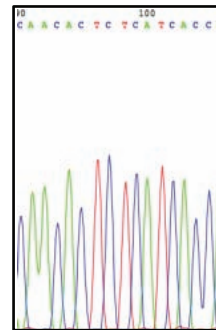

001/M2a

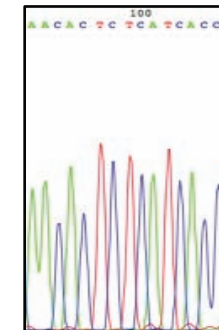

001/Blood



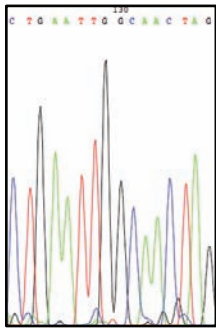

001/R3

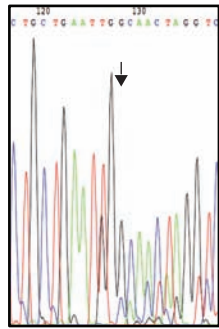

001/R4

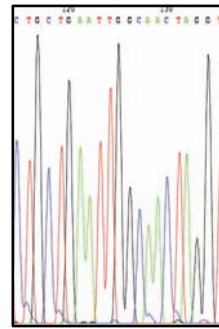

001/R9

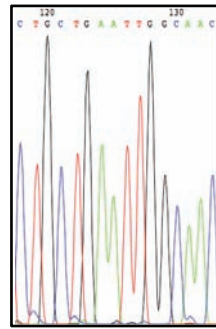

001/M2a

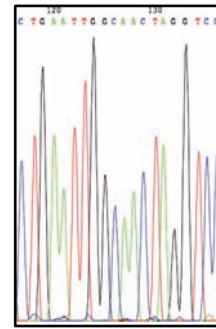

001/Blood

PLCL1

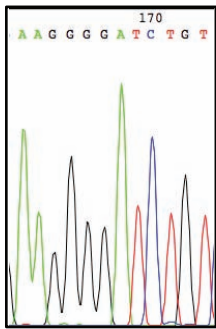

001/R3

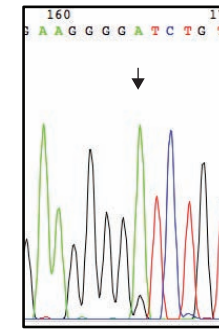

001/R4

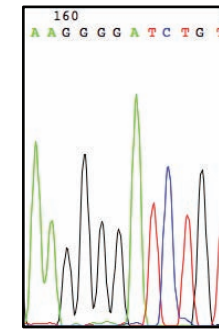

001/R9

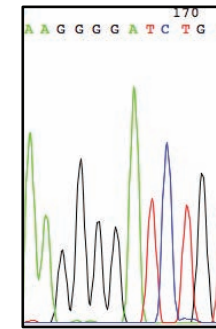

001/M2a

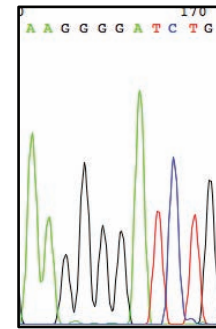

001/Blood

LAMA3

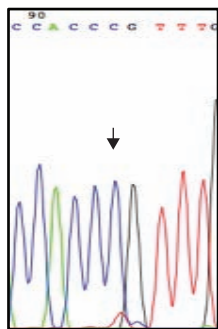

001/R3

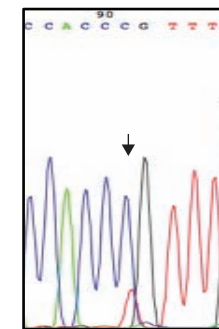

001/R4

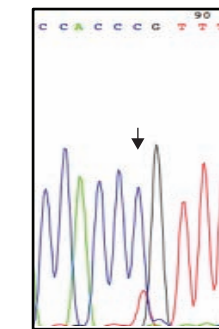

001/R9

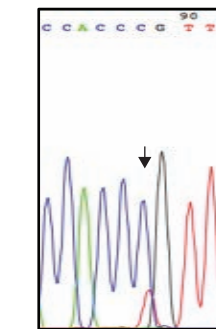

001/M2a

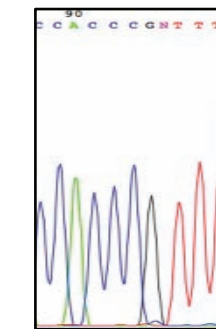

Blood

KDM2B

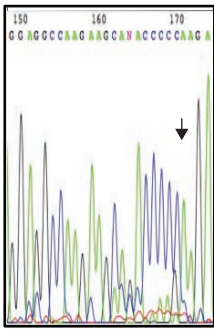

001/R3  
FLNA

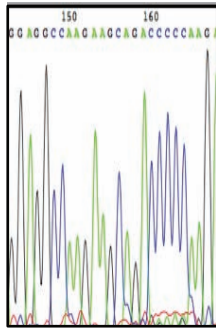

001/R4

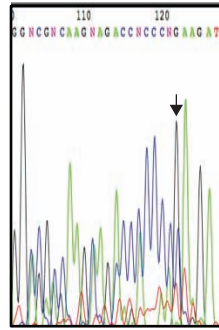

001/R9

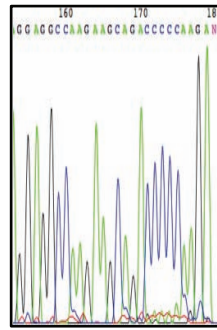

001/M2b

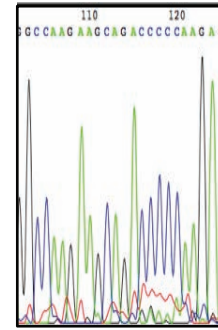

001/Blood

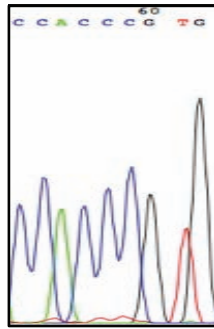

001/R3  
KIAA1267

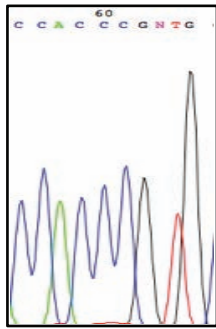

001/R4

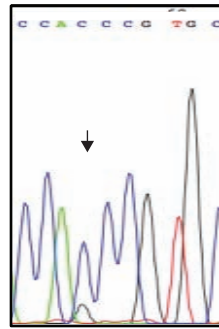

001/R9

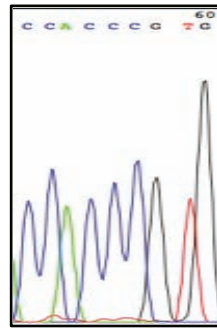

001/M2a

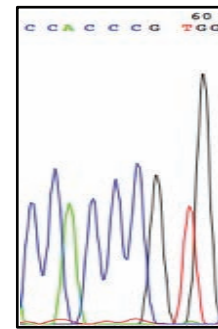

001/Blood

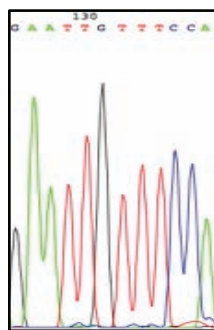

001/R3  
[-] CDH19

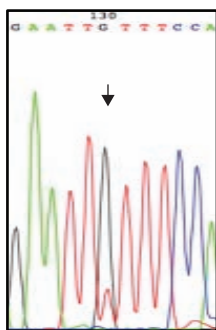

001/R4

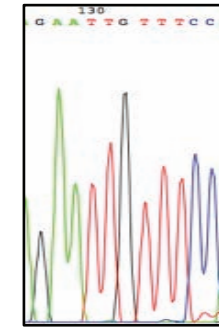

001/R9

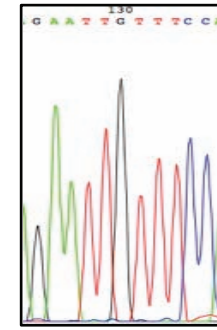

001/M2a

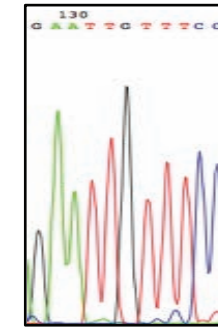

001/Blood

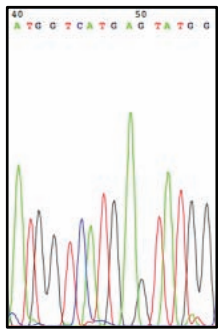

001/R3  
SLC2A1

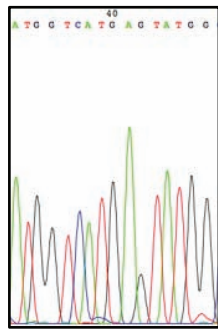

001/R4

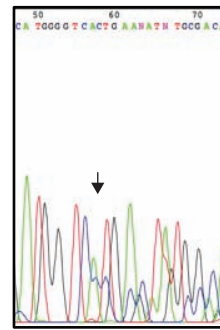

001/R9

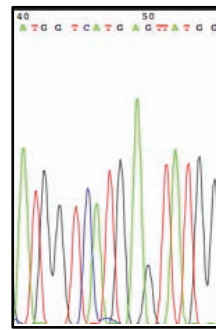

001/M2a

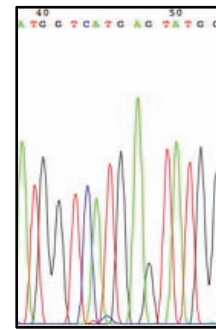

001/Blood

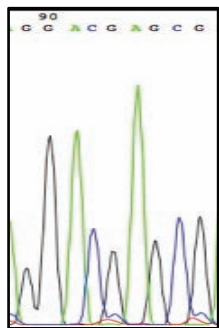

001/R3  
TM7SF4

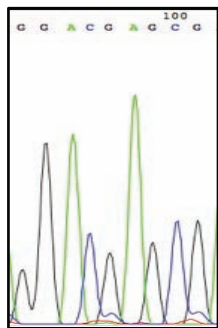

001/R4

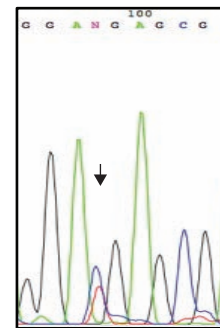

001/R9

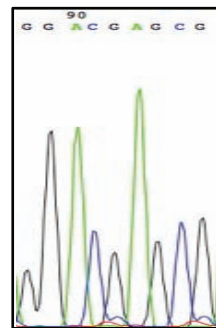

001/M2a

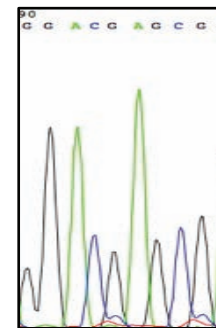

001/Blood

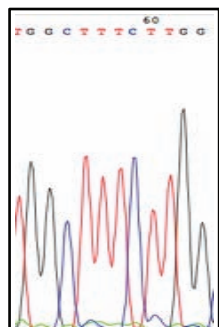

0001/R3  
NRAP

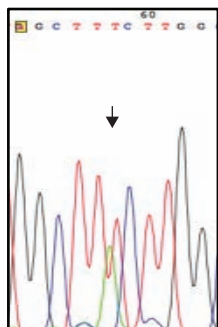

001/R4

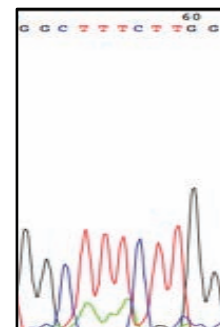

001/R9

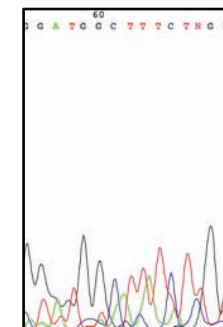

001/M2a

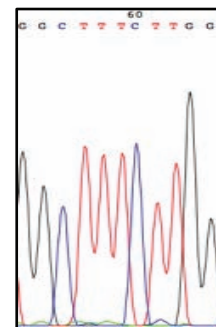

001/Blood



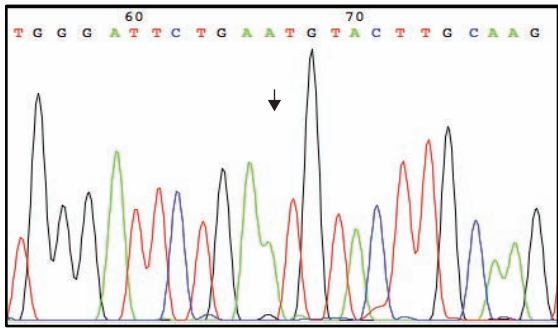

001/R1  
SGOL1

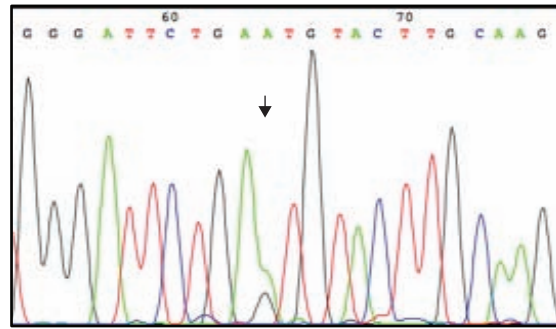

001/M2a

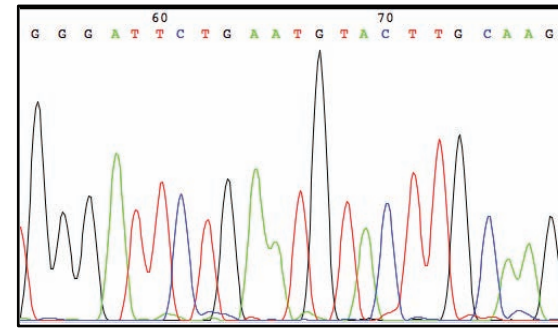

001/Blood

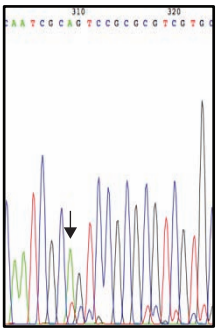

001/R1

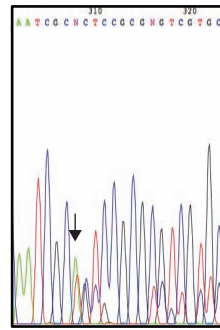

001/R2

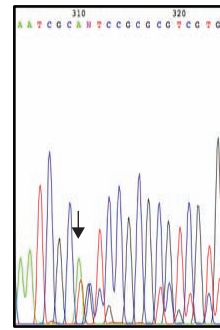

001/R3

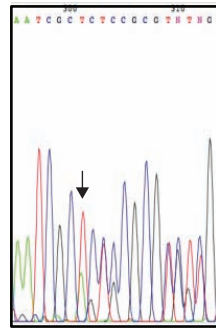

001/R4

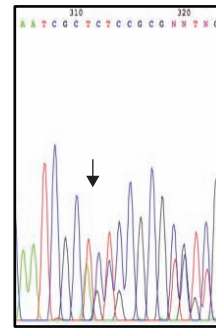

001/R9

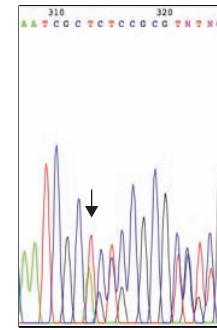

001/M2a

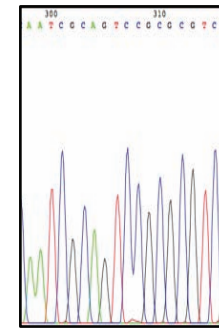

001/Blood

VHL

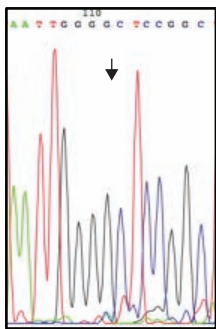

001/R3

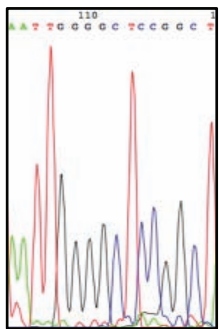

001/R4

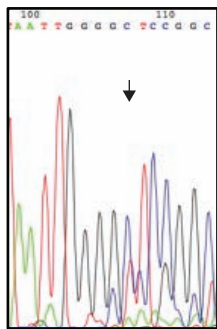

001/R9

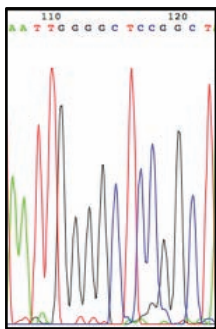

001/M2a

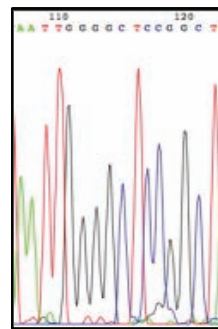

001/Blood

CDKN1B

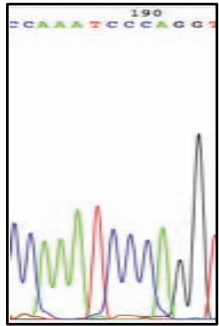

001/R3

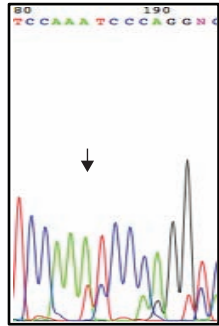

001/R4

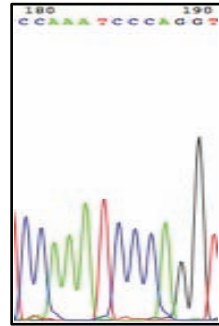

001/R9

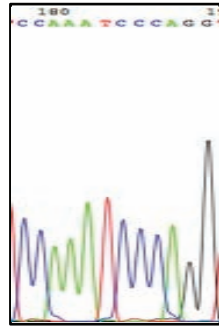

001/M2a

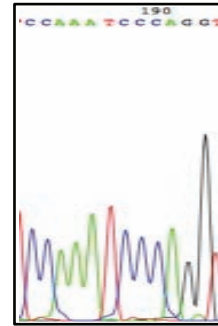

001/Blood

KIA1524

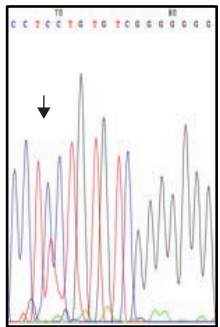

001/R3

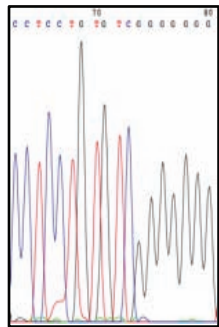

001/R4

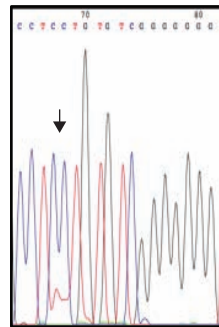

001/R9

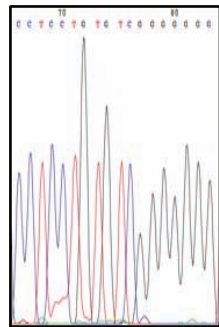

001/M2a

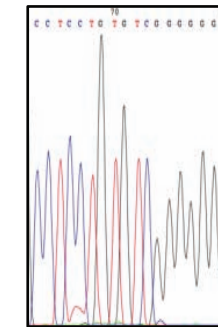

001/Blood

NPHS1

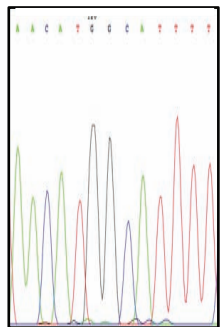

001/R2

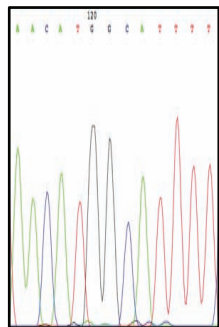

001/R3

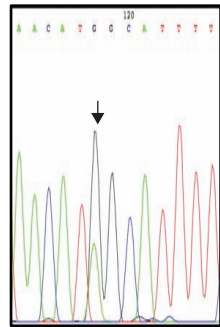

001/M2a

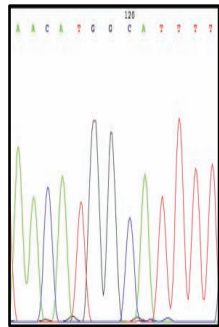

001/Blood

SETD2\_1

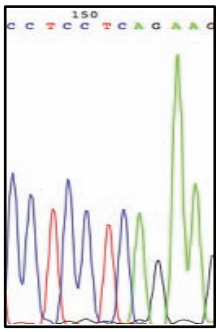

001/R3

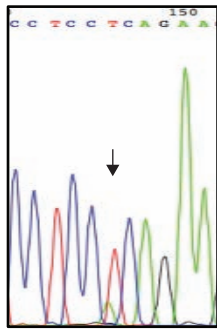

001/R4

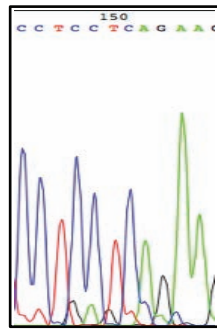

001/R9

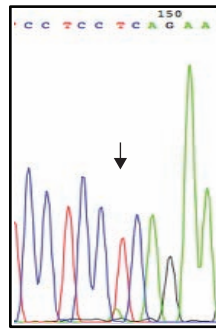

001/M2a

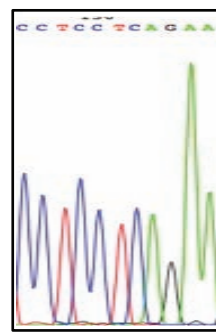

001/Blood

[-] ALKBH8

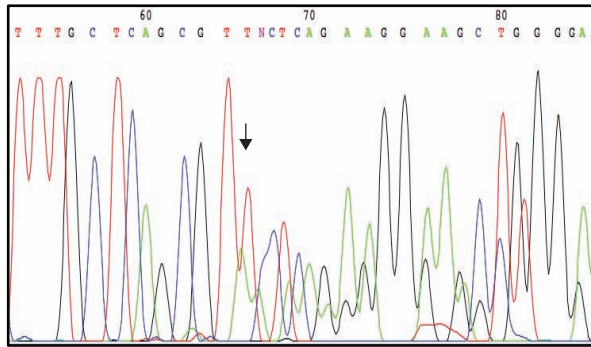

001/R9

SSNA1

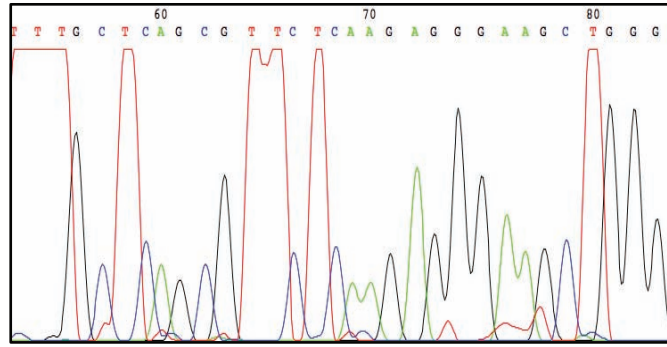

Blood

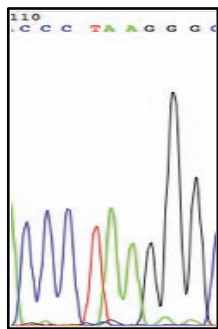

001/R3

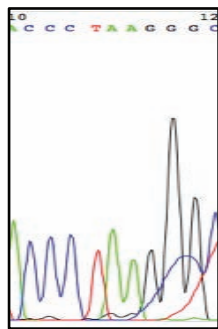

001/R4

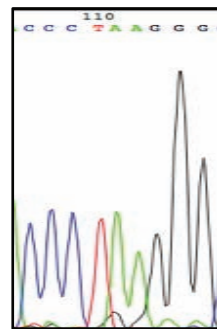

001/R9

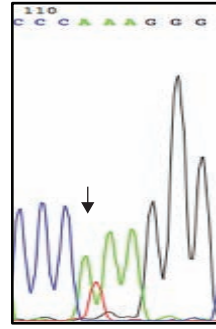

001/M2a

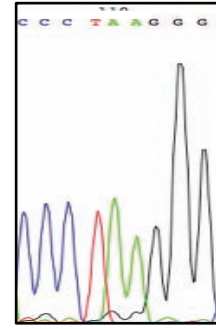

001/Blood

KDM5C (1) splice

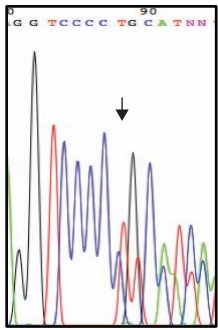

001/R3  
[-] KDM5C (2)

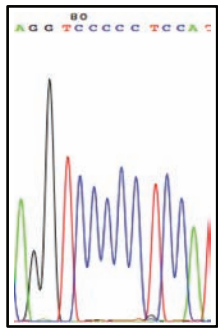

001/R4

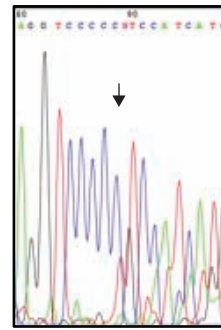

001/R9

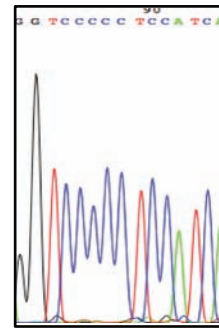

001/M2a

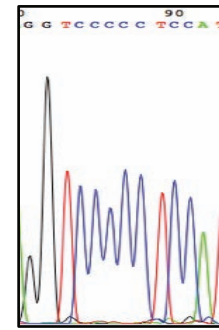

001/Blood

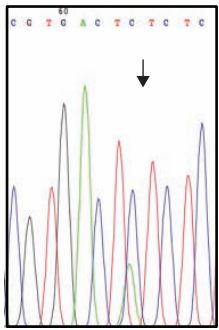

001/R3  
[-] LATS2

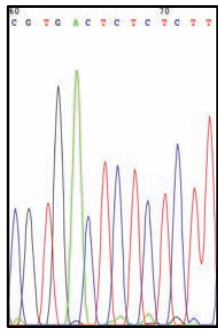

001/R4

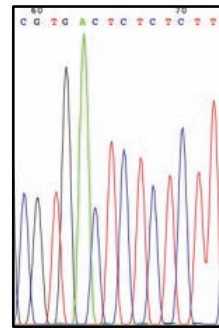

001/R9

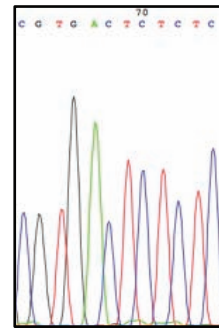

001/M2a

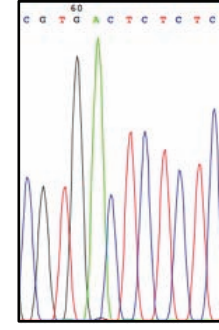

001/Blood

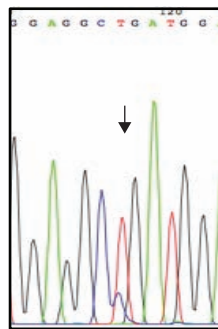

R3

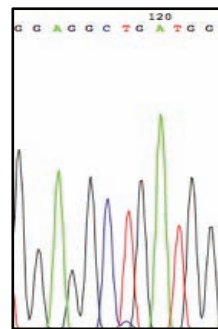

R4

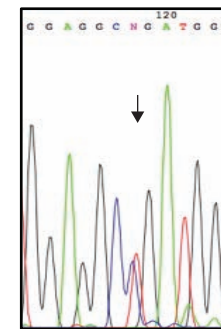

R9

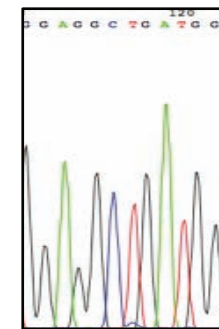

M2a

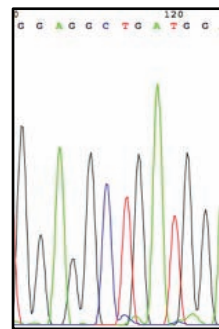

Blood

MTOR



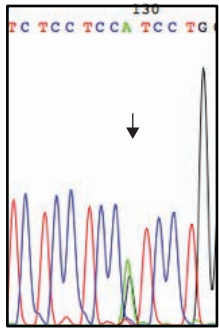

001/R3  
RALGDS

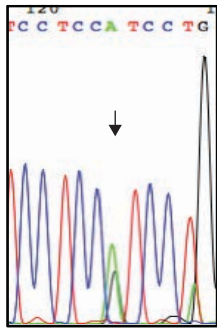

001/R4

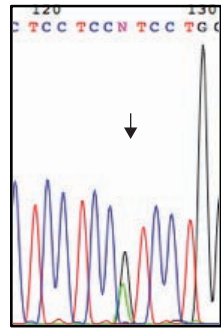

001/R9

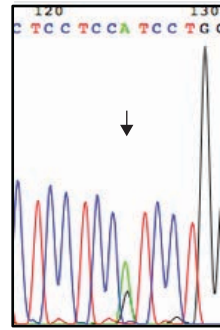

001/M2a

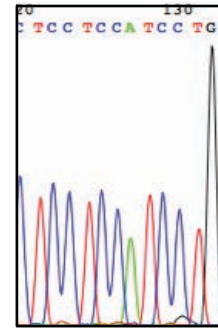

001/Blood

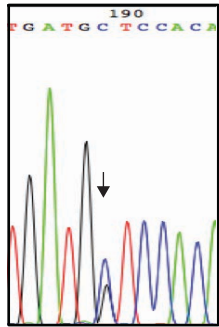

001/R3  
DDX52

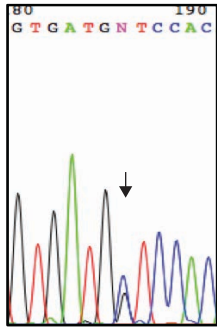

001/R4

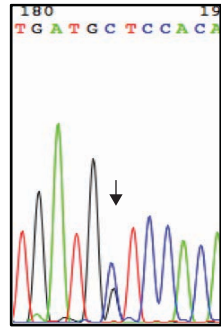

001/R9

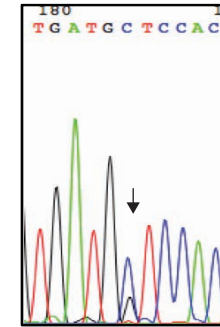

001/M2a

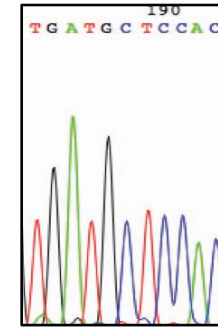

001/Blood

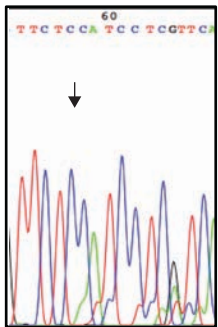

001/R3  
IGLON5

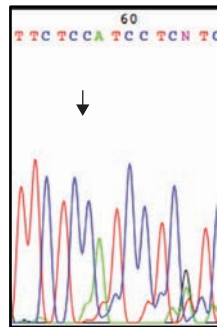

001/R4

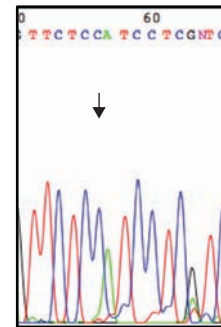

001/R9

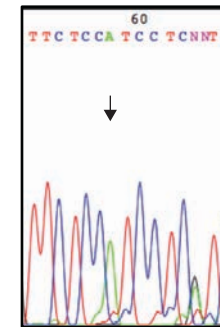

001/M2a

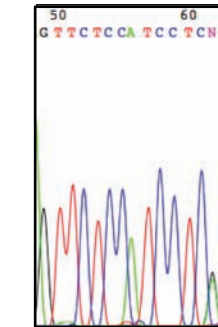

001/Blood

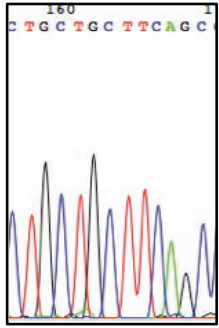

001/R3  
SPATA21

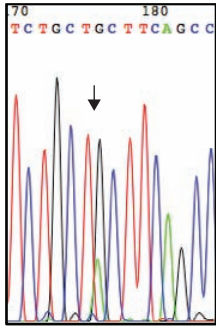

001/R4

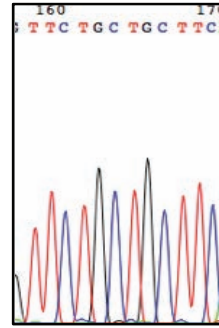

001/R9

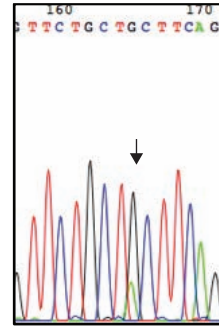

001/M2a

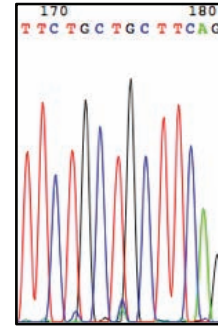

001/Blood

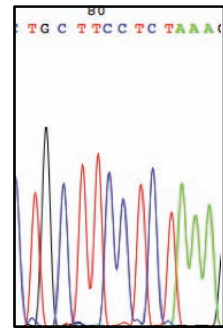

001/R3  
MYH8

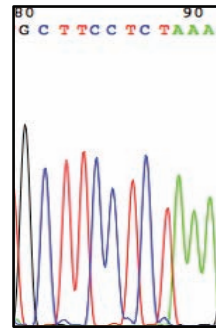

001/R4

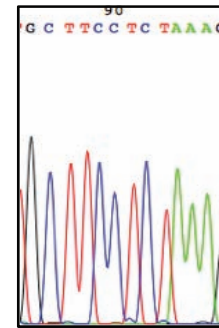

001/R9

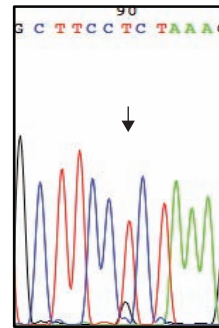

001/M1

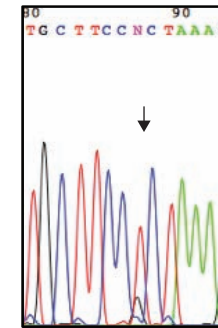

001/M2a

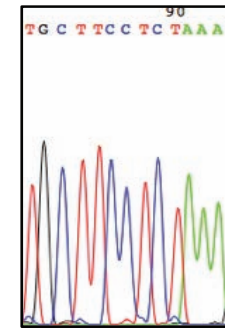

001/Blood

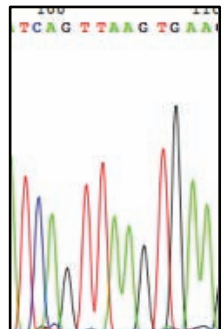

001/R3  
RAB27A

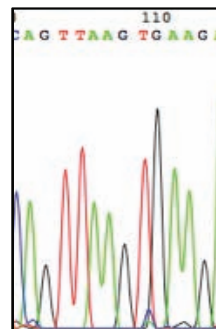

001/R4

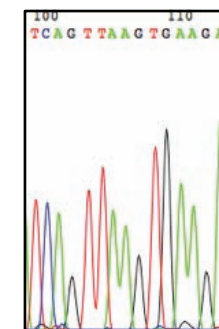

001/R9

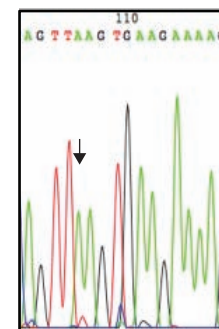

001/M1

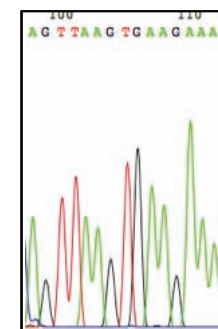

001/M2a

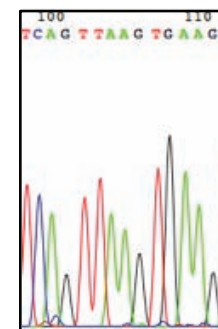

001/Blood

Supplementary Figure 2

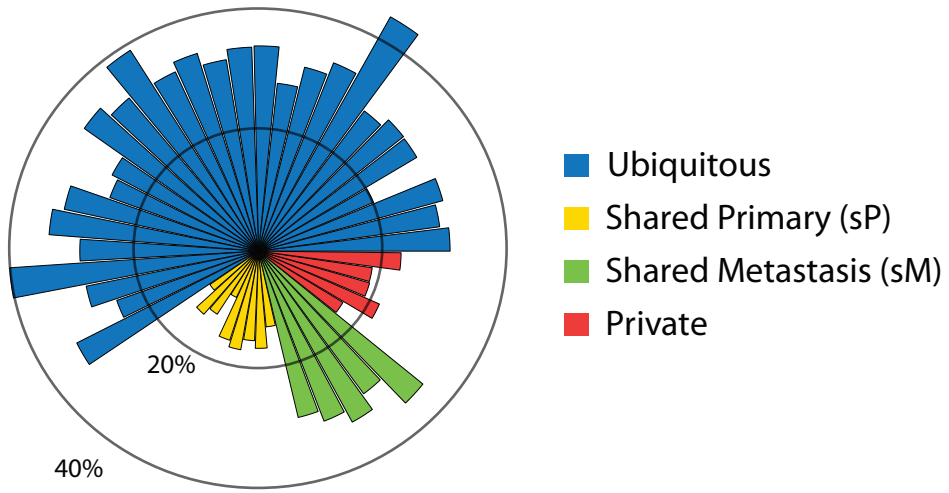

Supplementary Figure 3

**Patient 001 phylogenetic tree:**  
-based on synonymous and non coding variants  
-branch length proportional to variant number  
-numbers indicate the numbers of variants/branch

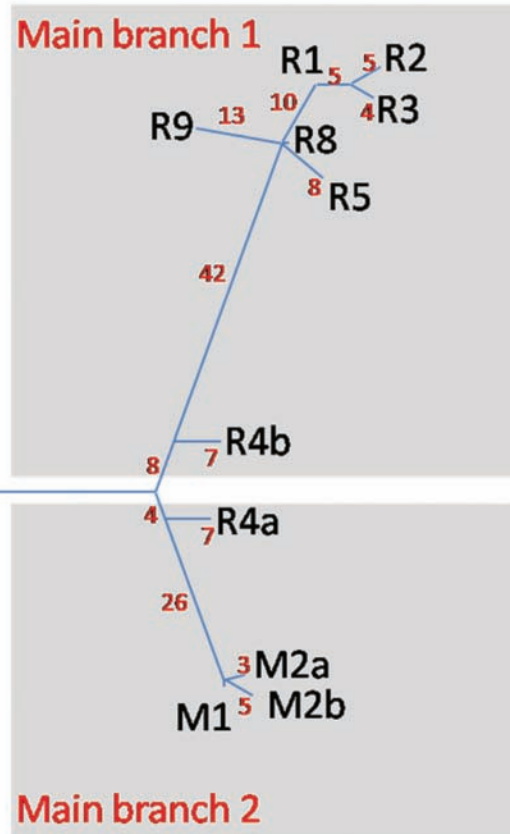



Supplementary Figure 4

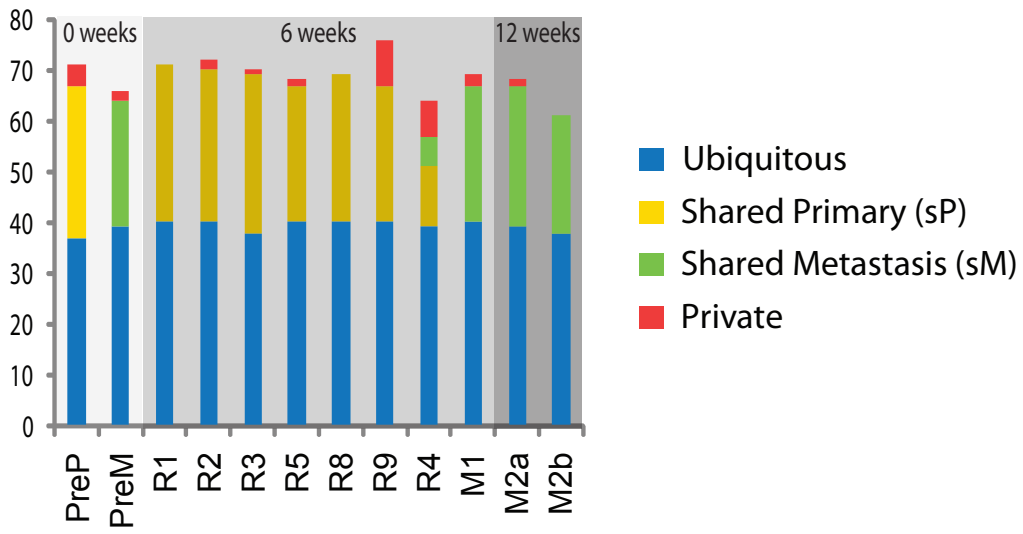

Supplementary Figure 5

A

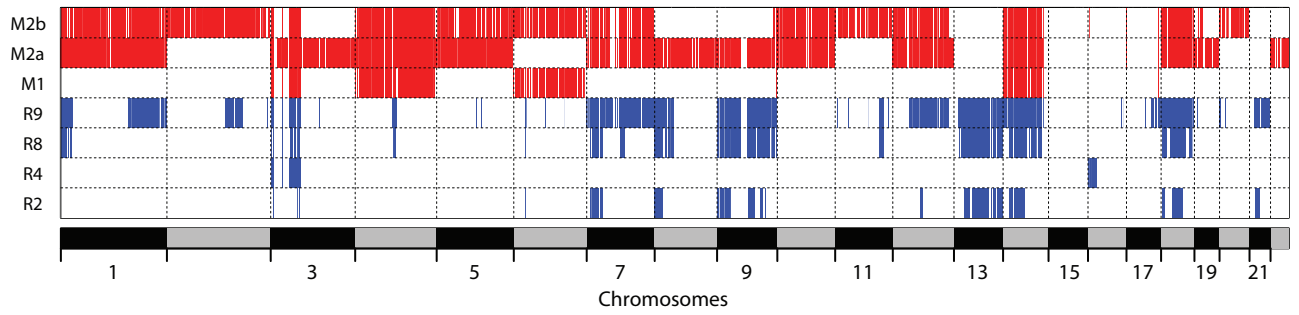

B

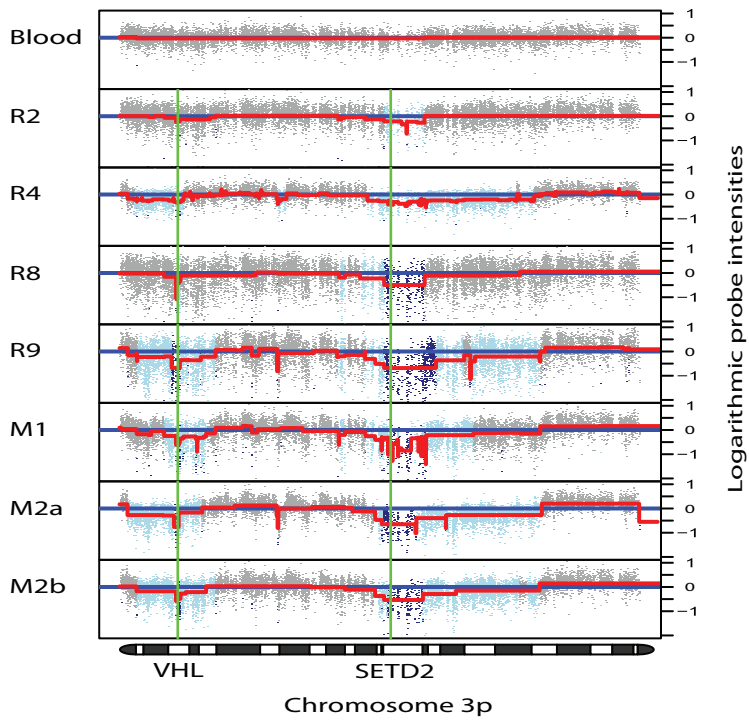

Supplementary Figure 6

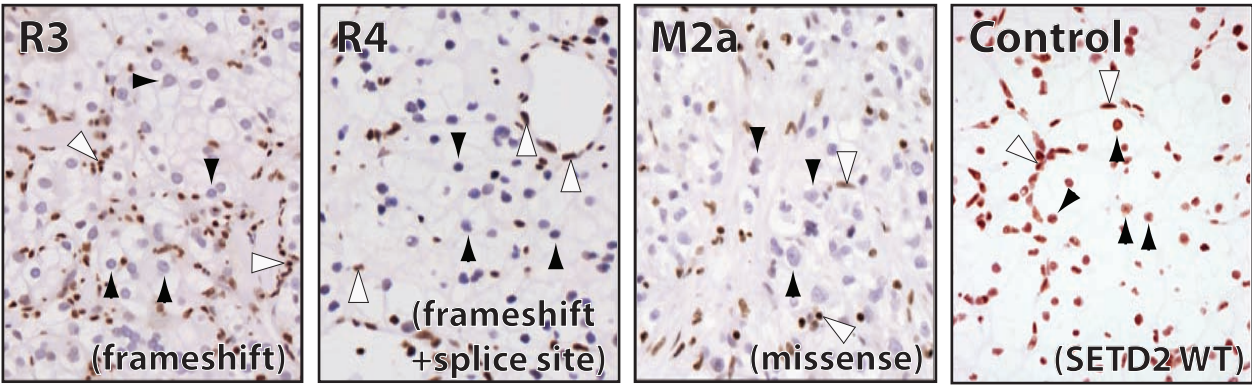

H3K36me3

Supplementary Figure 7

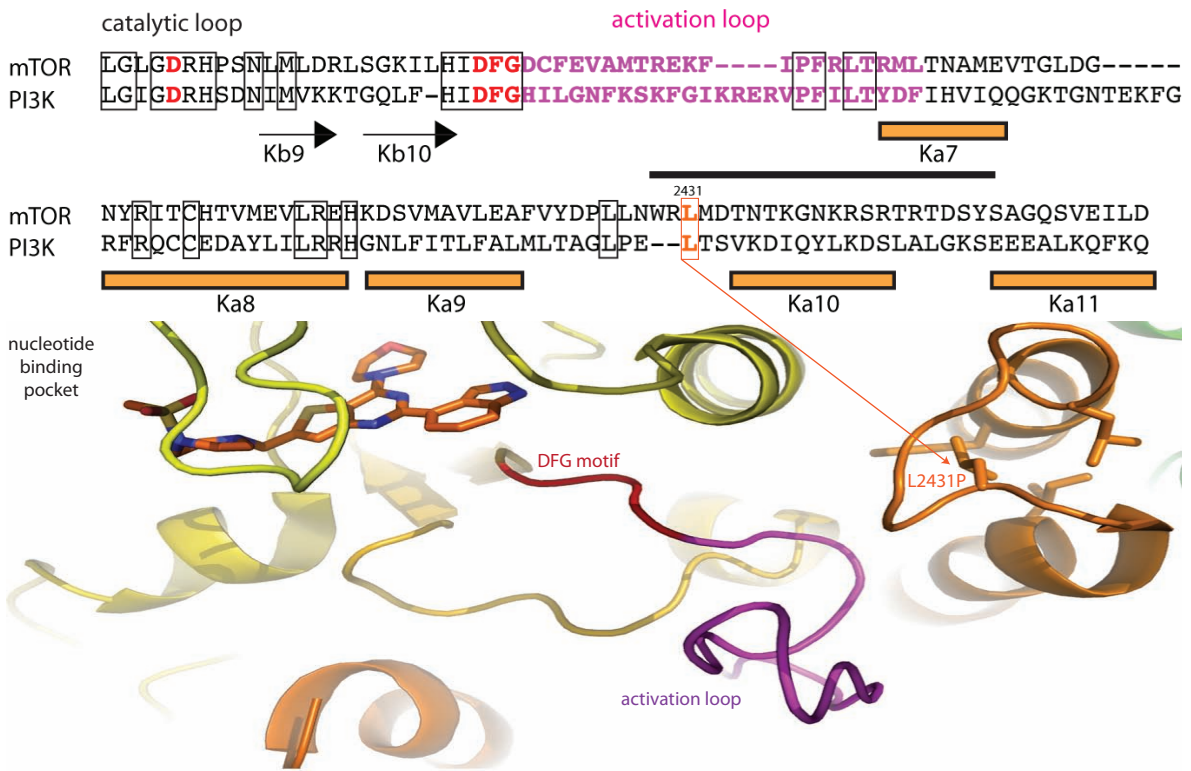

Supplementary Figure 8

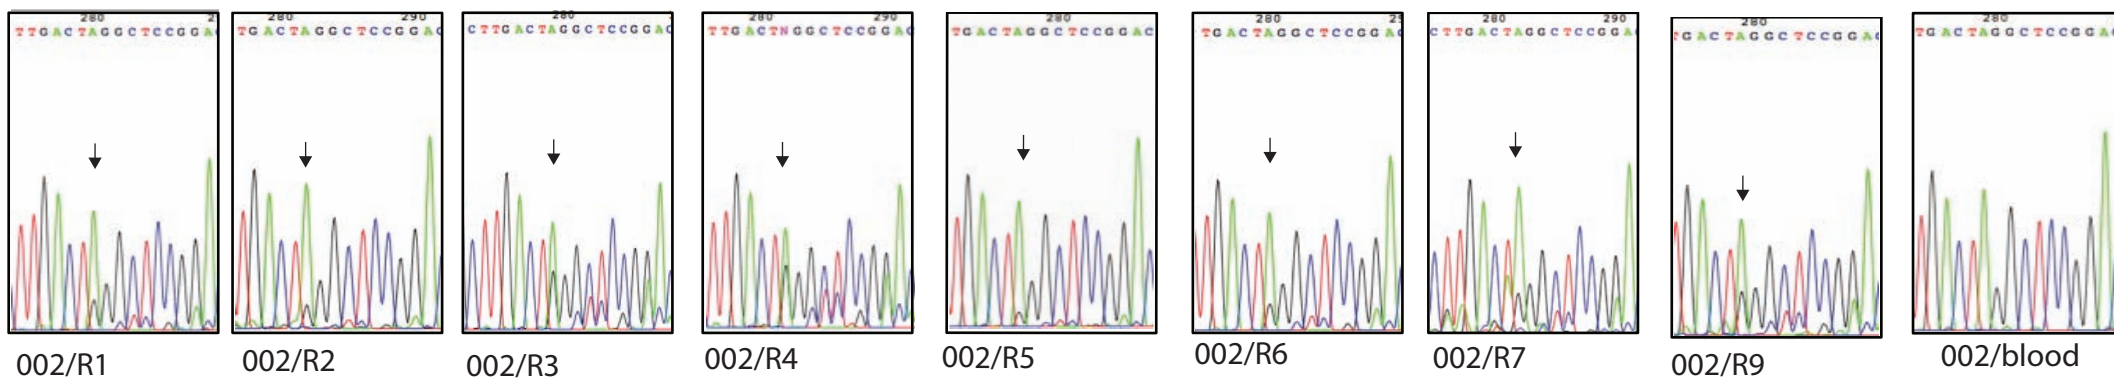

VHL

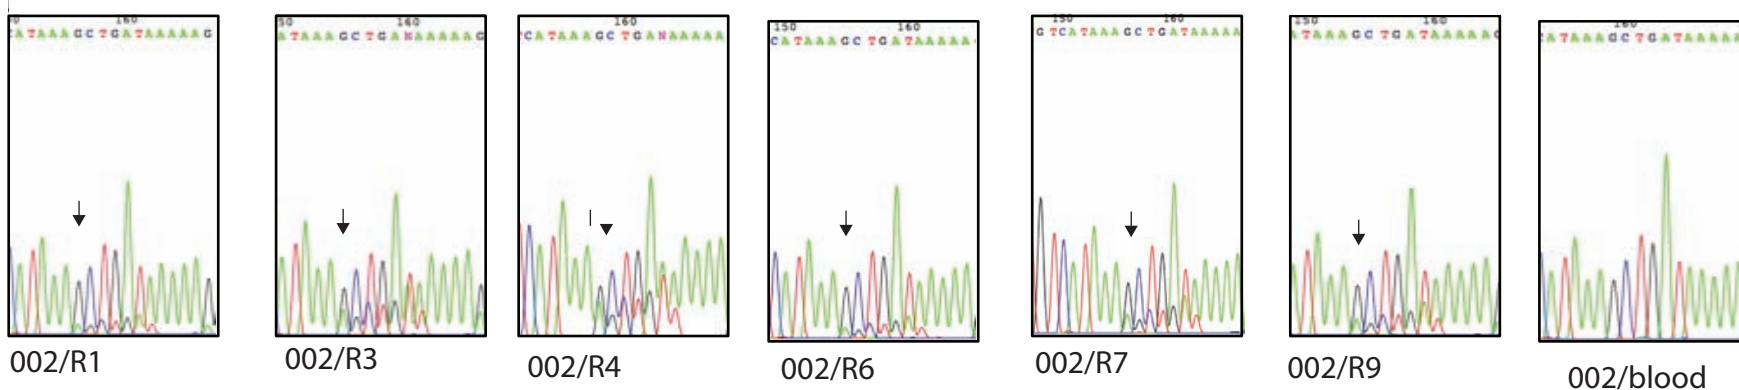

PBRM1

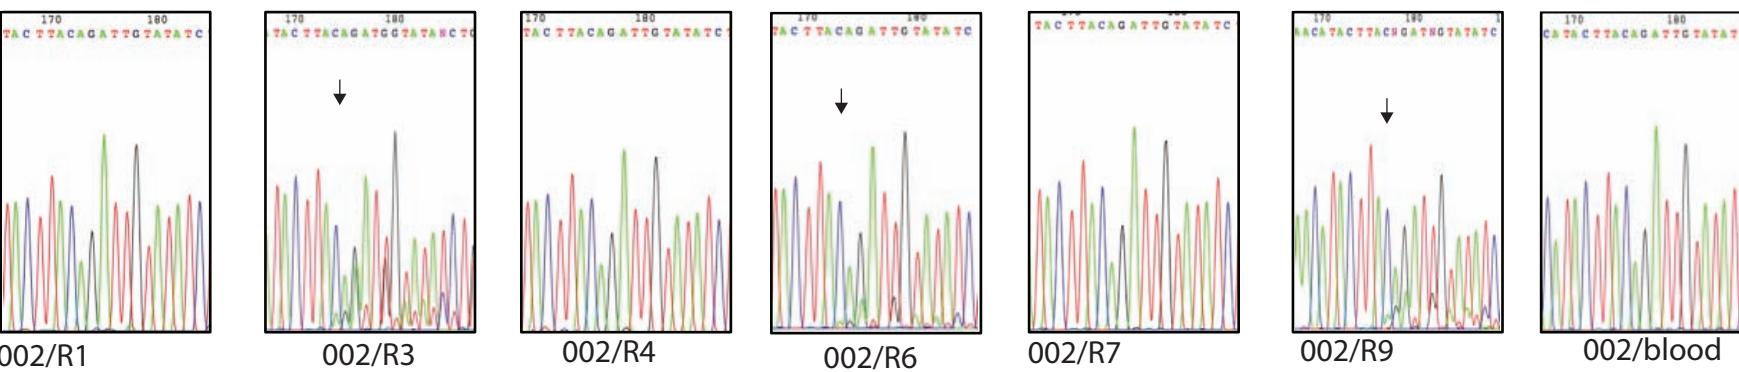

PTEN

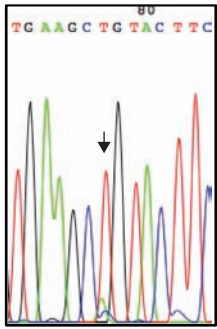

PTEN 002/R7

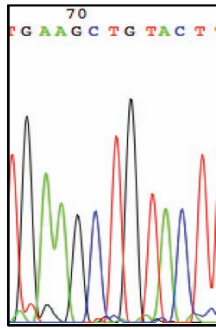

002/R2

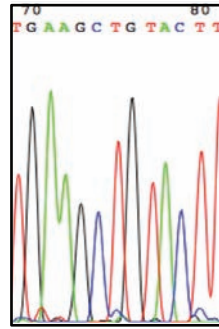

002/R6

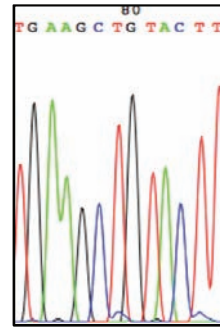

002/blood

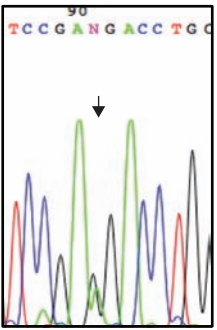

002/R7  
MYC

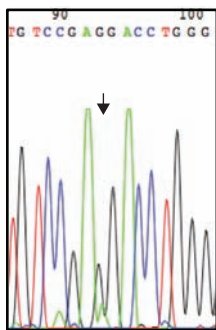

002/R9

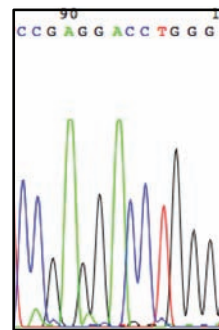

002/blood

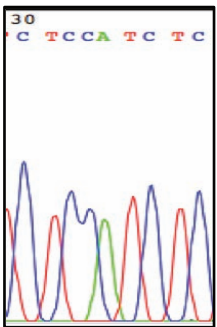

002/R3  
OR10H3

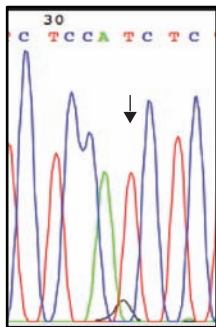

002/R4

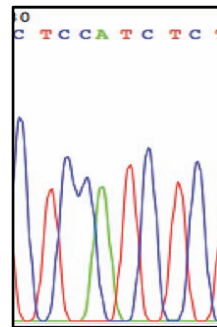

002/R5

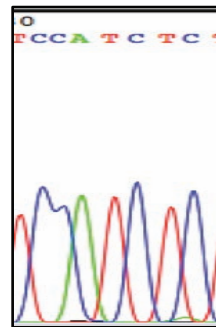

002/M

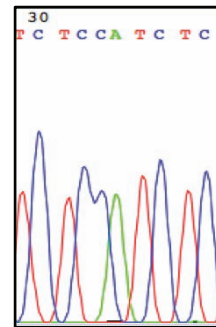

002/blood



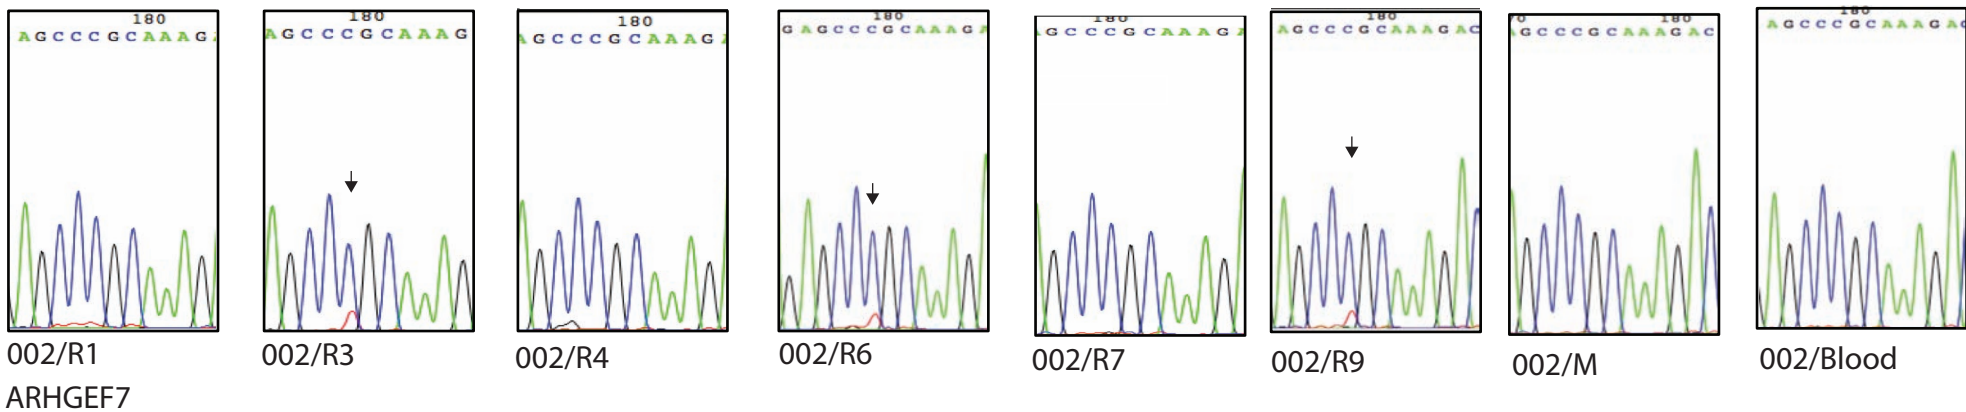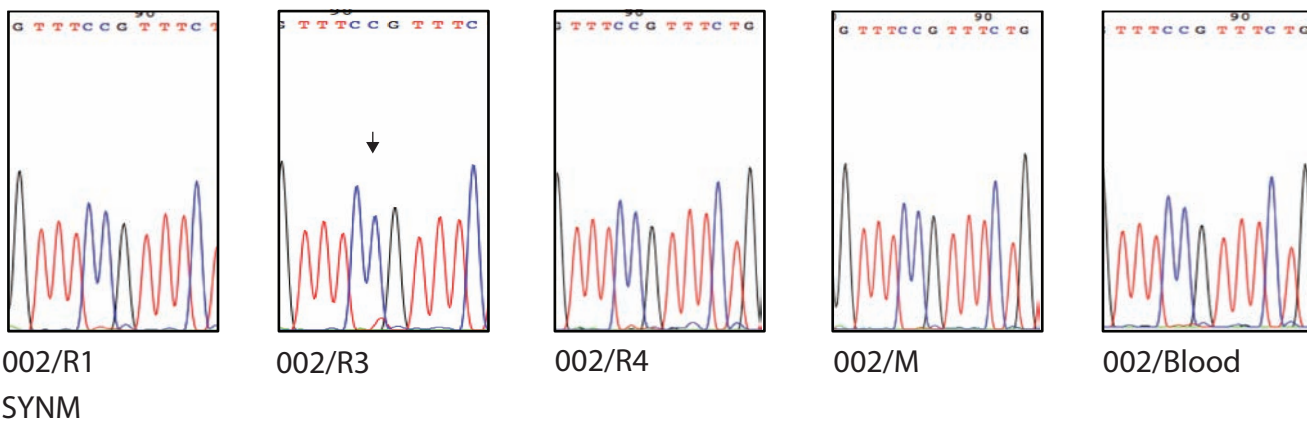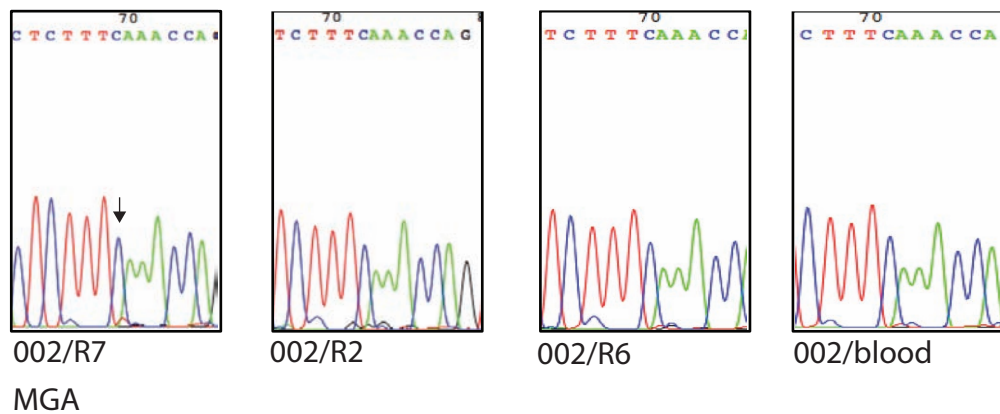

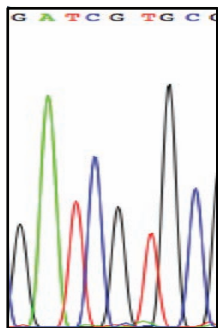

002/R2  
GRIK5

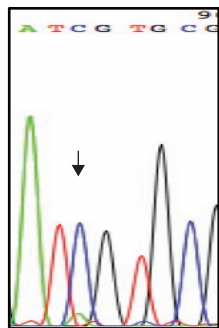

002/R3

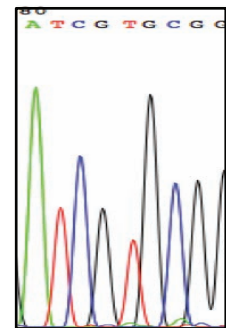

002/R4

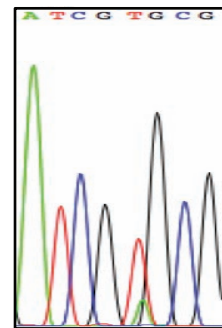

002/M

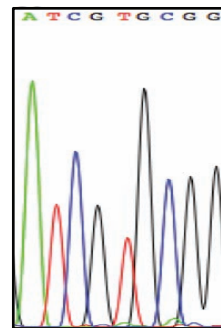

002/Blood

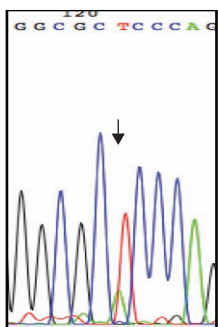

002/R3  
PPP1R1B

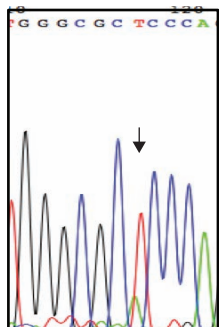

002/R4

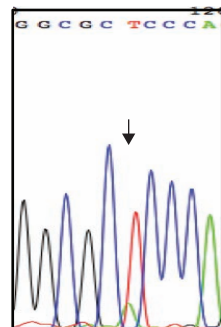

002/R7

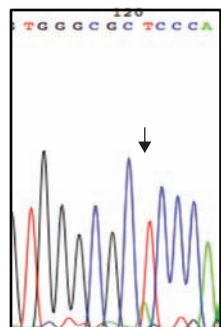

002/R9

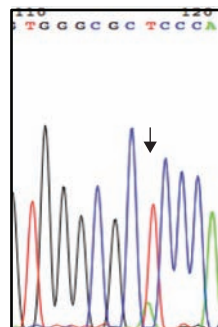

002/M

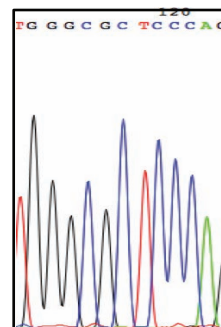

002/Blood

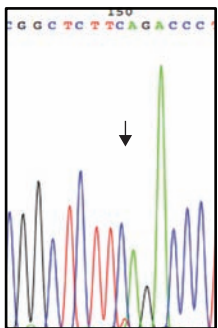

002/R3  
TNKS1BP1

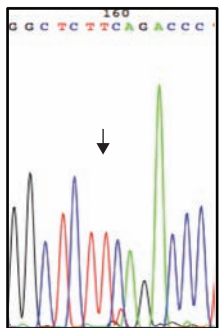

002/R4

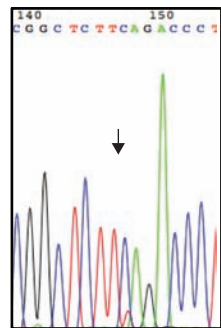

002/R7

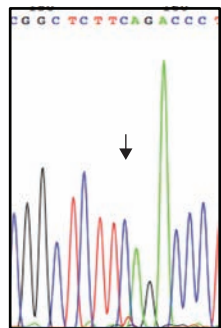

002/R9

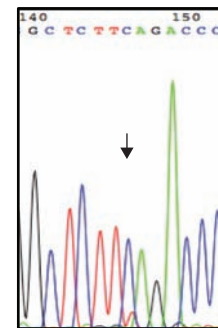

002/M

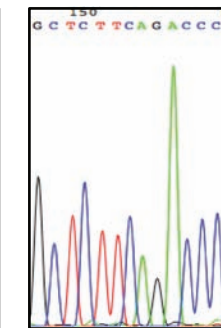

002/Blood



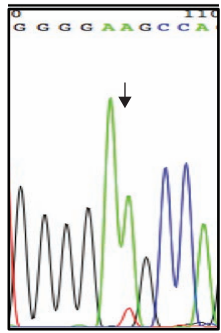

002/R3  
RNF8

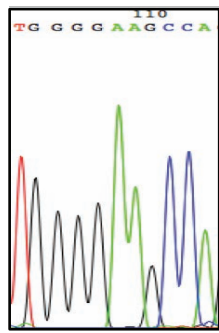

002/R4

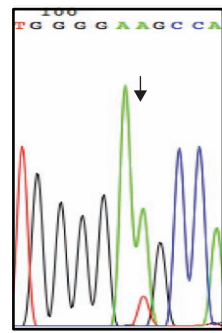

002/R7

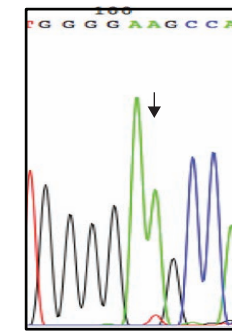

002/R9

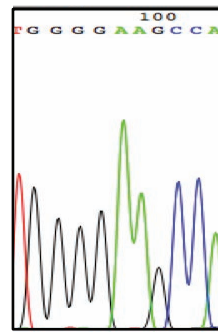

002/M

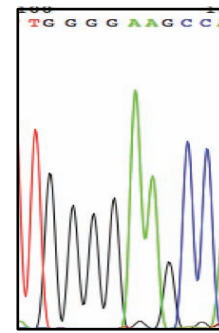

002/Blood

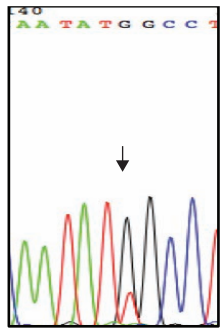

002/R3  
FLG

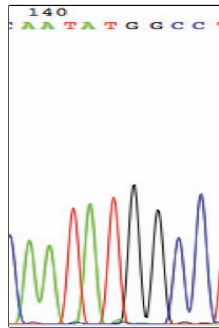

002/R4

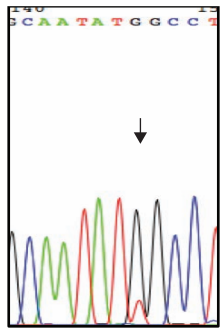

002/R7

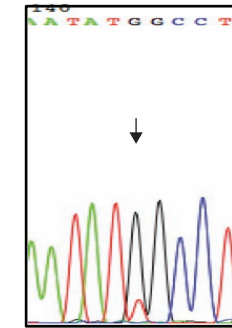

002/R9

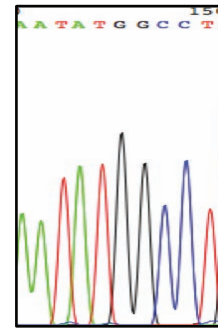

002/M

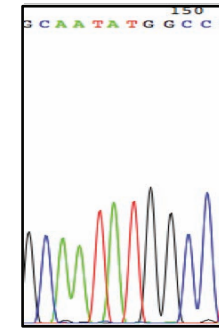

002/Blood

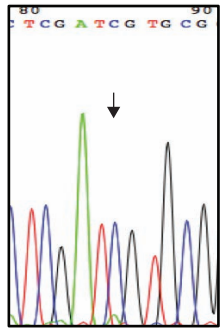

002/R3  
MLLT4

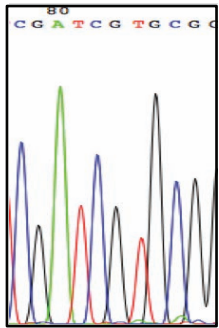

002/R4

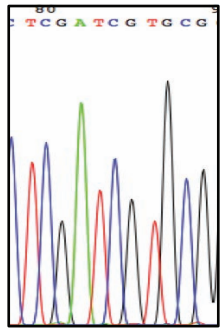

002/R7

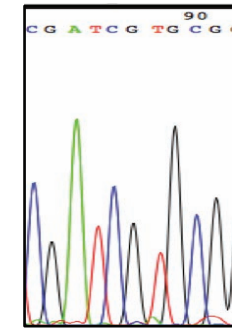

002/R9

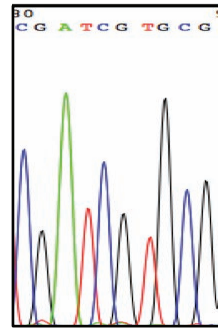

002/M

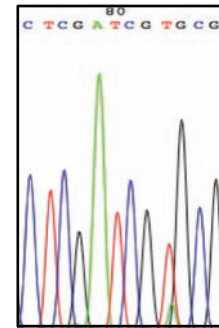

002/Blood

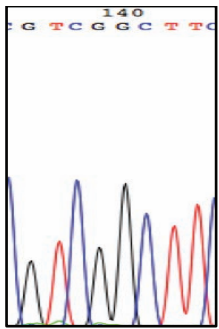

002/R2  
NPHP4

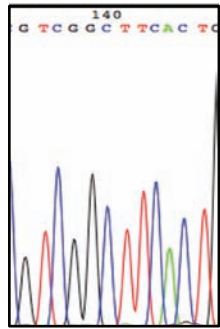

002/R4

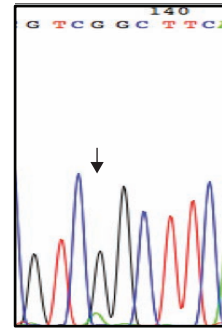

002/R7

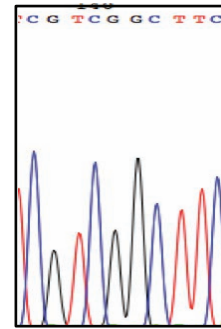

002/R9

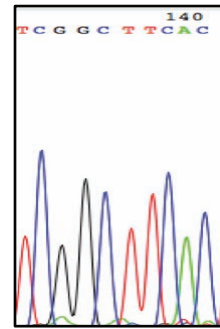

002/M

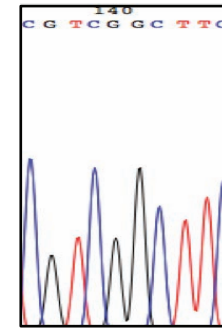

002/Blood

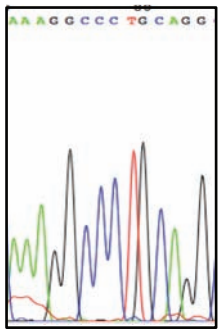

002/R2  
DNAH2

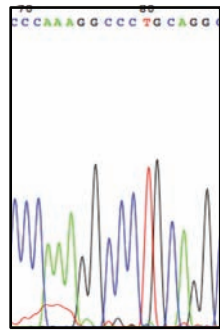

002/R4

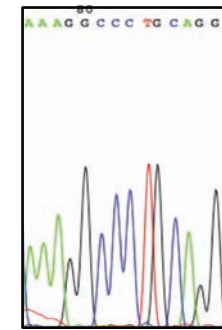

002/R7

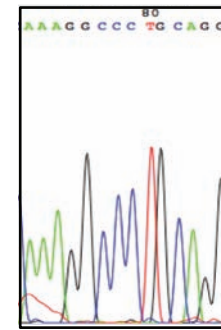

002/R9

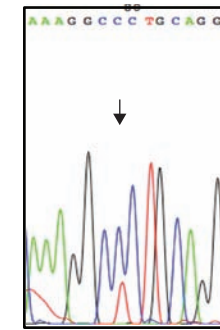

002/M

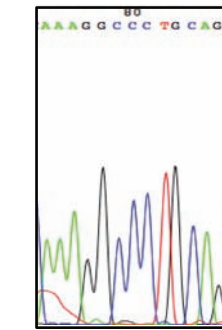

002/Blood

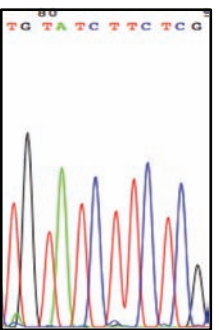

002/R2  
CPVL

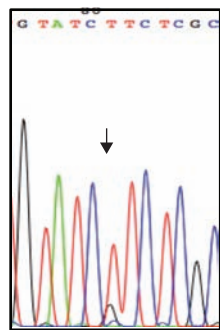

002/R4

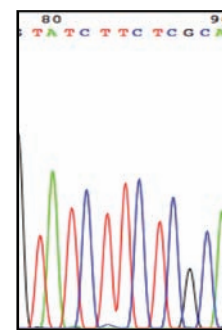

002/R7

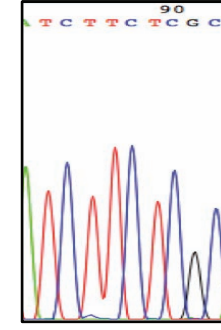

002/R9

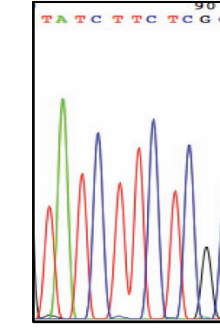

002/M

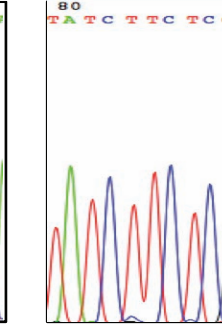

002/Blood

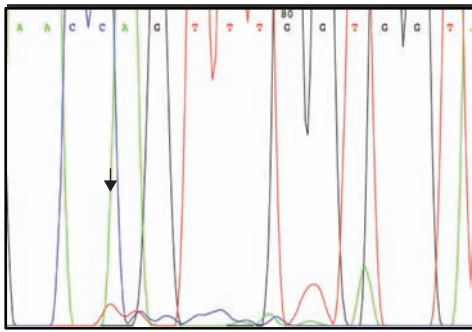

002/R9

SETD2\_1

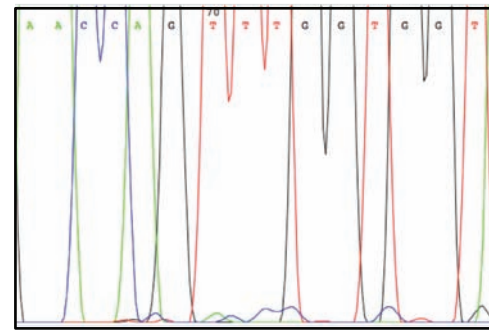

002/Blood

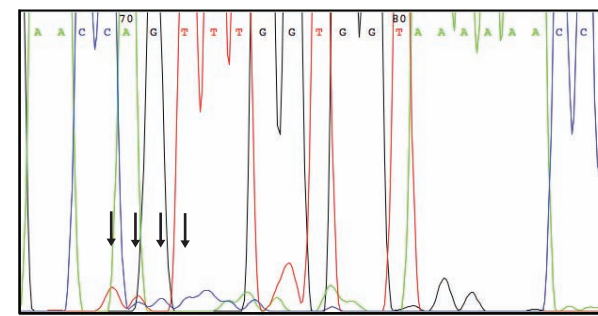

NORMAL

MUTANT

A A C C A G T T T G G T G G T A A A  
 A A C T T C C A G T T T G G T G G  
 4bp insertion

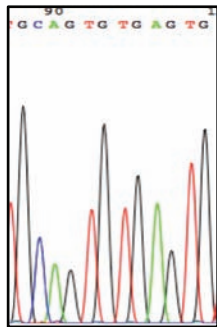

002/R4

SETD2\_2

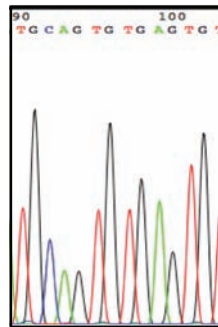

002/R7

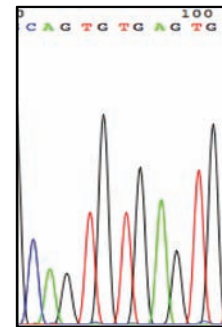

002/R9

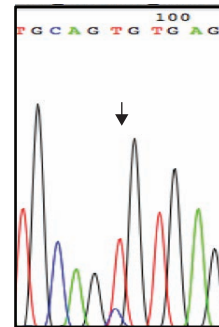

002/M

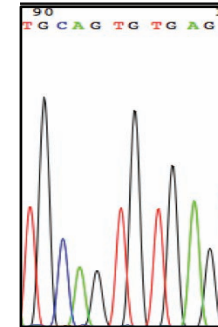

002/Blood

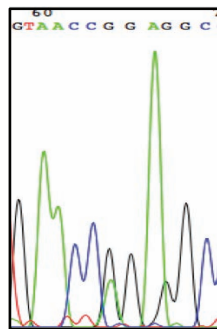

002/R4

TP53

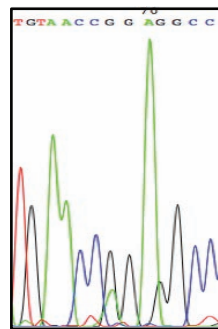

002/R9

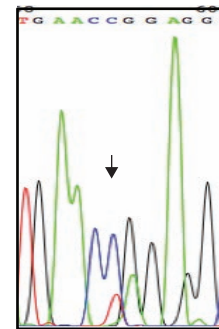

002/M

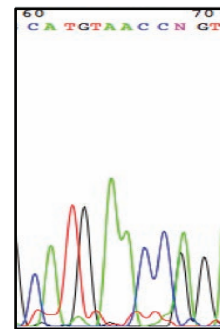

002/Blood

Supplementary Figure 9

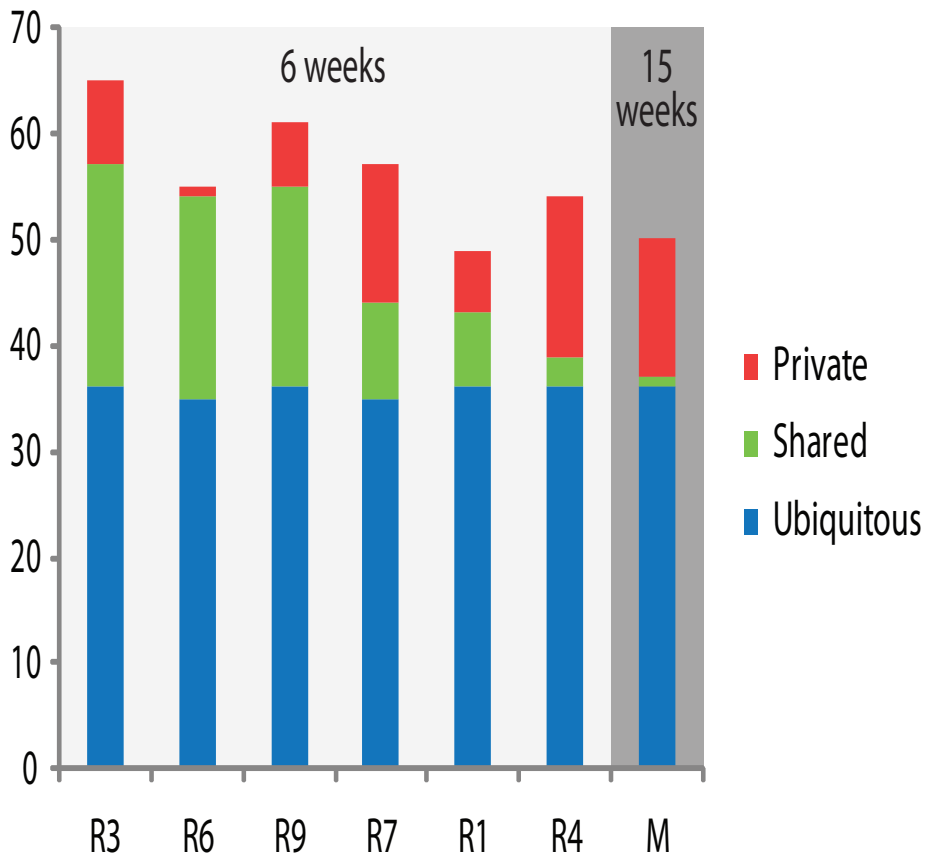

# Supplementary Figure 10

Patient 002

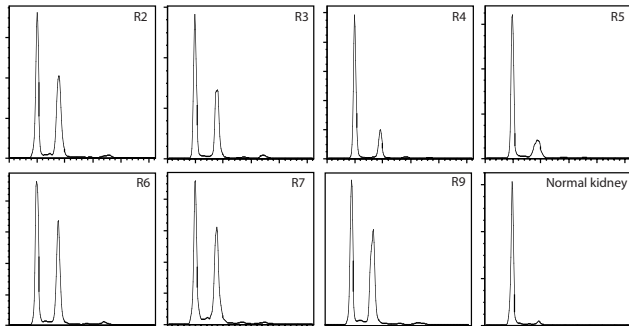

Patient 003

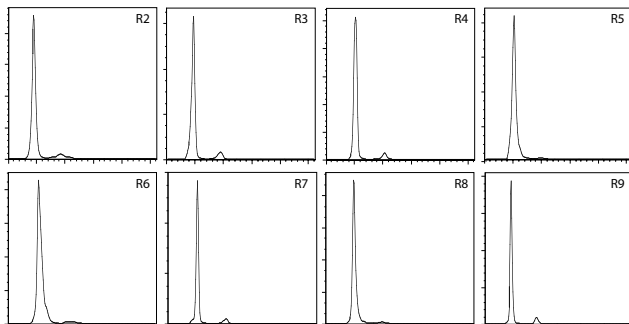

Patient 004

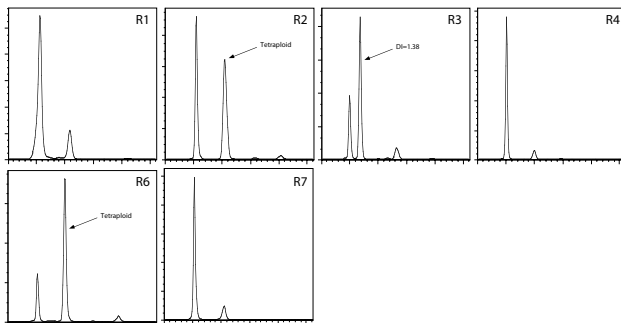



Supplementary Figure 12

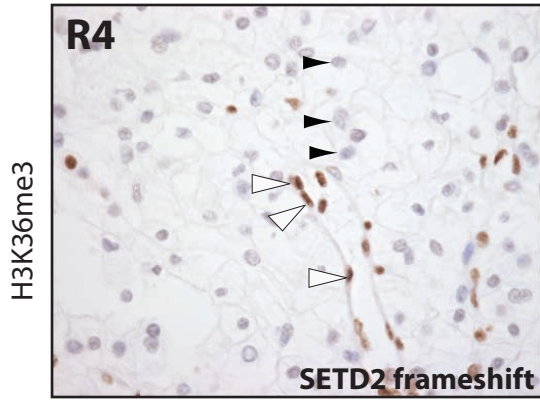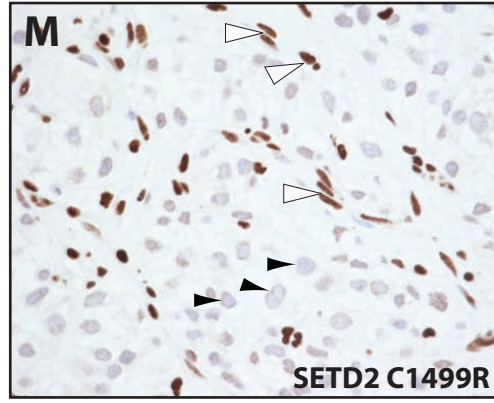



Supplementary Figure 13

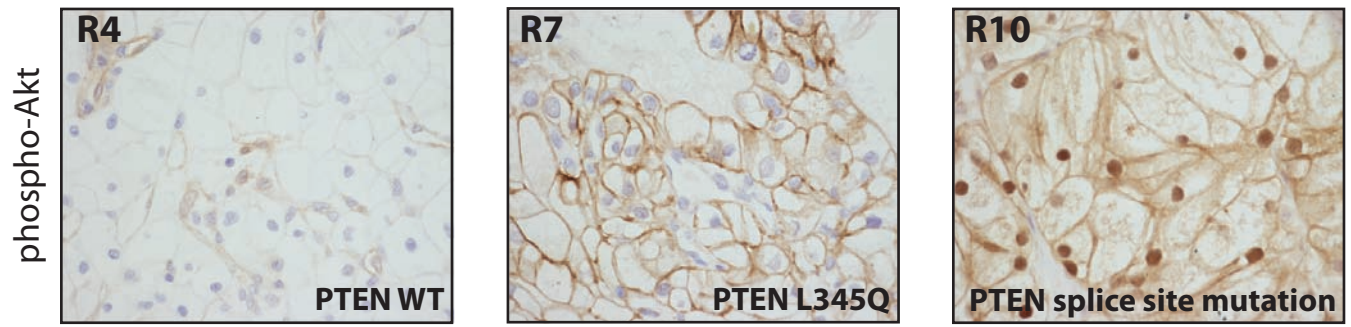



Patient 004 H3K36me3

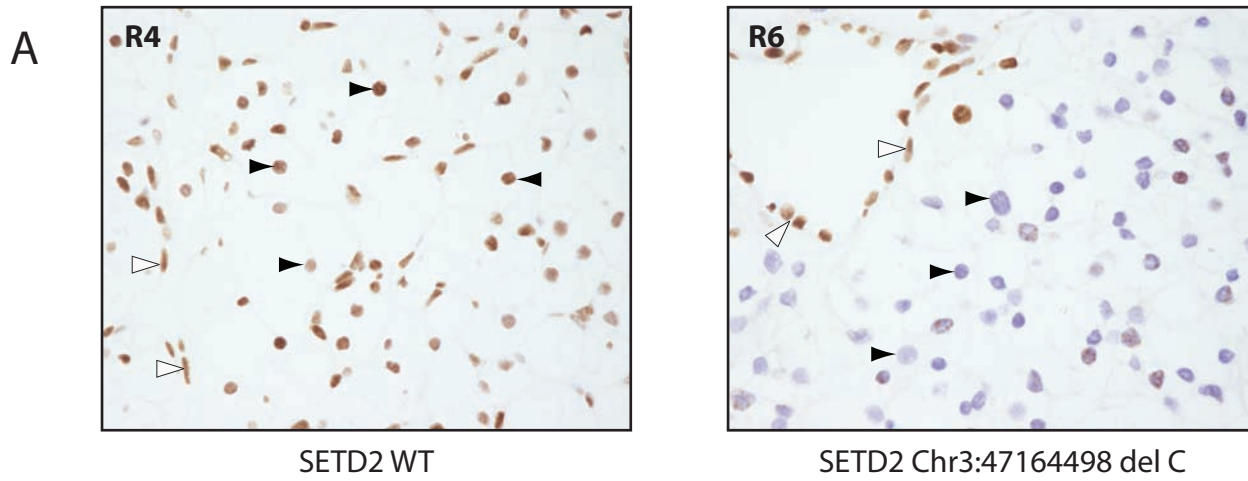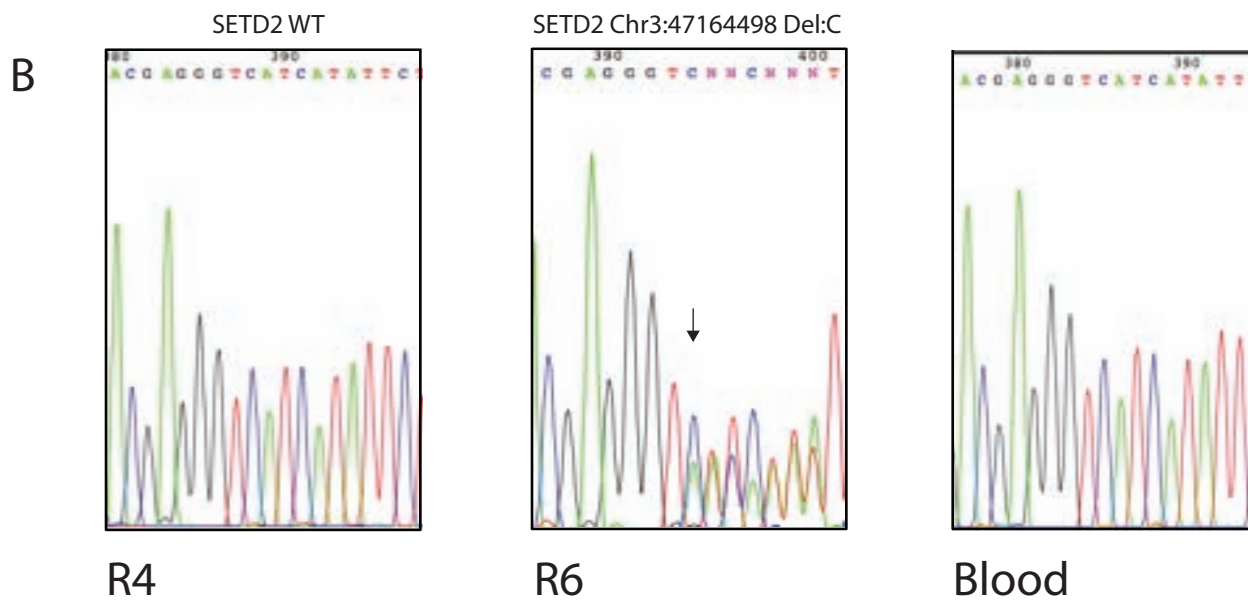

Supplement: NIHMS68079-supplement-Supplementary_appendix.pdf [file NIHMS68079-supplement-Supplementary_appendix.pdf]
